# Supplementary material
Source: Royal Society of Chemistry journal article supplement (doi:10.1039/d5tc04200c)
Supplement: d5tc04200c1.pdf [file d5tc04200c1.pdf]

## Supporting Information

# Triple-Readout Luminescence Thermometry in a Heterodinuclear Yb-Er Complex and Performance Comparison with the Homodinuclear Analogues

Yolimar Gil,<sup>a\*</sup> Julio Corredoira-Vázquez,<sup>b,c</sup> Ricardo Costa de Santana,<sup>d</sup> Andres Vega,<sup>e</sup> Albano N. Carneiro Neto,<sup>f,g</sup> Daniel Aravena,<sup>h</sup> Evgenia Spodine,<sup>a</sup> Carlos D. S. Brites,<sup>f</sup> Luís D. Carlos,<sup>\*f</sup> Pablo Fuentealba<sup>a\*</sup>.

<sup>a</sup> Facultad de Ciencias Químicas y Farmacéuticas, Universidad de Chile, Olivos 1007, 8380544, Santiago, Chile. E-mail: [yolimar.gil@ciq.uchile.cl](mailto:yolimar.gil@ciq.uchile.cl)

<sup>b</sup> Departamento de Química Inorgánica, Facultad de Química, Universidade de Santiago de Compostela, 15782 Santiago de Compostela, Spain.

<sup>c</sup> Institute of Materials (iMATUS), Universidade de Santiago de Compostela, 15782 Santiago de Compostela, Spain.

<sup>d</sup> Instituto de Física, Universidade Federal de Goiás, Campus Samambaia, 74690-900, Goiânia, GO, Brazil.

<sup>e</sup> Departamento de Ciencias Químicas, Universidad Andrés Bello, Av. República 275, 8370011, Santiago, Chile.

<sup>f</sup> Phantom-g, CICECO – Aveiro Institute of Materials, Department of Physics, University of Aveiro, 3810-193 – Aveiro, Portugal. E-mail: [lcarlos@ua.pt](mailto:lcarlos@ua.pt)

<sup>g</sup> Department of Molecular Theory and Spectroscopy, Max Planck Institut für Kohlenforschung, Mülheim an der Ruhr D-45470, Germany.

<sup>h</sup> Departamento de Química de los Materiales, Facultad de Química y Biología, Universidad de Santiago de Chile, Casilla 40, Correo 33, Santiago, Chile

## Contents

|                                                |                                              |
|------------------------------------------------|----------------------------------------------|
| 1. Synthesis and molecular characterization .2 | Figure S7. ....12                            |
| Figure S1. ....3                               | Figure S8 .....13                            |
| Figure S2 .....4                               | Figure S9 .....13                            |
| 2. Structural Characterization .....4          | Figure S10. ....14                           |
| Scheme S1 .....4                               | Table S6.....14                              |
| Figure S3. ....5                               | Figure S11 .....15                           |
| Table S1 .....6                                | Figure S12 .....16                           |
| Table S2 .....7                                | 3. Photoluminescence Characterization.....17 |
| Table S3 .....7                                | Figure S13 .....17                           |
| Table S4 .....8                                | Figure S14 .....17                           |
| Figure S4 .....8                               | Figure S15 .....18                           |
| Figure S5 .....9                               | 4. Thermometric Characterization.....18      |
| Table S5 .....9                                | Figure S16 .....19                           |
| Figure S6 .....10                              | Figure S17 .....19                           |

## Supporting Information

|                                  |    |                  |    |
|----------------------------------|----|------------------|----|
| Figure S18 .....                 | 20 | Table S10.....   | 31 |
| Figure S19 .....                 | 20 | Table S11.....   | 32 |
| Figure S20 .....                 | 21 | Table S12.....   | 32 |
| Table S7.....                    | 22 | Figure S25.....  | 33 |
| 5. Theoretical calculations..... | 23 | Figure S26.....  | 33 |
| Figure S21.....                  | 23 | Table S13.....   | 34 |
| Figure S22.....                  | 24 | Figure S27.....  | 36 |
| Table S8.....                    | 25 | Figure S28.....  | 37 |
| Figure S23.....                  | 25 | Figure S29.....  | 37 |
| Figure S24.....                  | 27 | References ..... | 38 |
| Table S9.....                    | 30 |                  |    |

### 1. Synthesis and molecular characterization

**Synthesis of Homodinuclear  $[\{\text{Ln}(\text{tta})_3\}_2(\mu^2\text{-bpm})]$  ( $\text{Ln} = \text{Yb}^{3+}$  (**2**),  $\text{Er}^{3+}$  (**3**)).** In a 30-mL volume microwave vial, 2-thenoyltrifluoro-acetone (267 mg, 1.2 mmol) was dissolved in 15 mL of methanol:ethanol mixture (1:1). Then, triethylamine (168  $\mu\text{L}$ , 1.2 mmol) and  $\text{Ln}(\text{NO}_3)_3 \cdot 6\text{H}_2\text{O}$  (180 mg ( $\text{Ln}^{3+} : \text{Yb}$ ) or 177 mg ( $\text{Ln}^{3+} : \text{Er}$ ), 0.4 mmol) were added and the mixture was stirred for 15 min. Finally, a solution of bpm (31.6 mg, 0.2 mmol) in 5 mL of the same solvent mixture was added, and the resulting solution was irradiated in the microwave reactor for 15 min at 100 ° (See Figure S1 for the full reaction profiles recorded by the instrument). X-ray single crystals were obtained by slow evaporation of the reaction solutions after 4 days. Pale yellow rods were obtained for  $[\{\text{Yb}(\text{tta})_3\}_2(\mu^2\text{-bpm})]$  (**2**) with a yield of 265mg (72.4%), while  $[\{\text{Er}(\text{tta})_3\}_2(\mu^2\text{-bpm})]$  (**3**) afforded pale pink blocks with a yield of 285mg (78.3%). Anal. calc. for **2**:  $\text{C}_{56}\text{H}_{30}\text{F}_{18}\text{N}_4\text{O}_{12}\text{S}_6\text{Yb}_2$ : C, 36.73; H, 1.65; N, 3.06 %. Found C, 36.44; H, 1.76; N, 3.13 %. Anal. calc. for **3**:  $\text{C}_{56}\text{H}_{30}\text{Er}_2\text{F}_{18}\text{N}_4\text{O}_{12}\text{S}_6$ : C, 36.96; H, 1.66; N, 3.08 %. Found C, 36.91; H, 1.79; N, 3.15 %. ESI-MS for **2**:  $m/z = 1849.8982$   $[\text{M}+\text{NH}_4]^+$ , and for **3**:  $m/z = 1837.8793$   $[\text{M}+\text{NH}_4]^+$ .

## Supporting Information

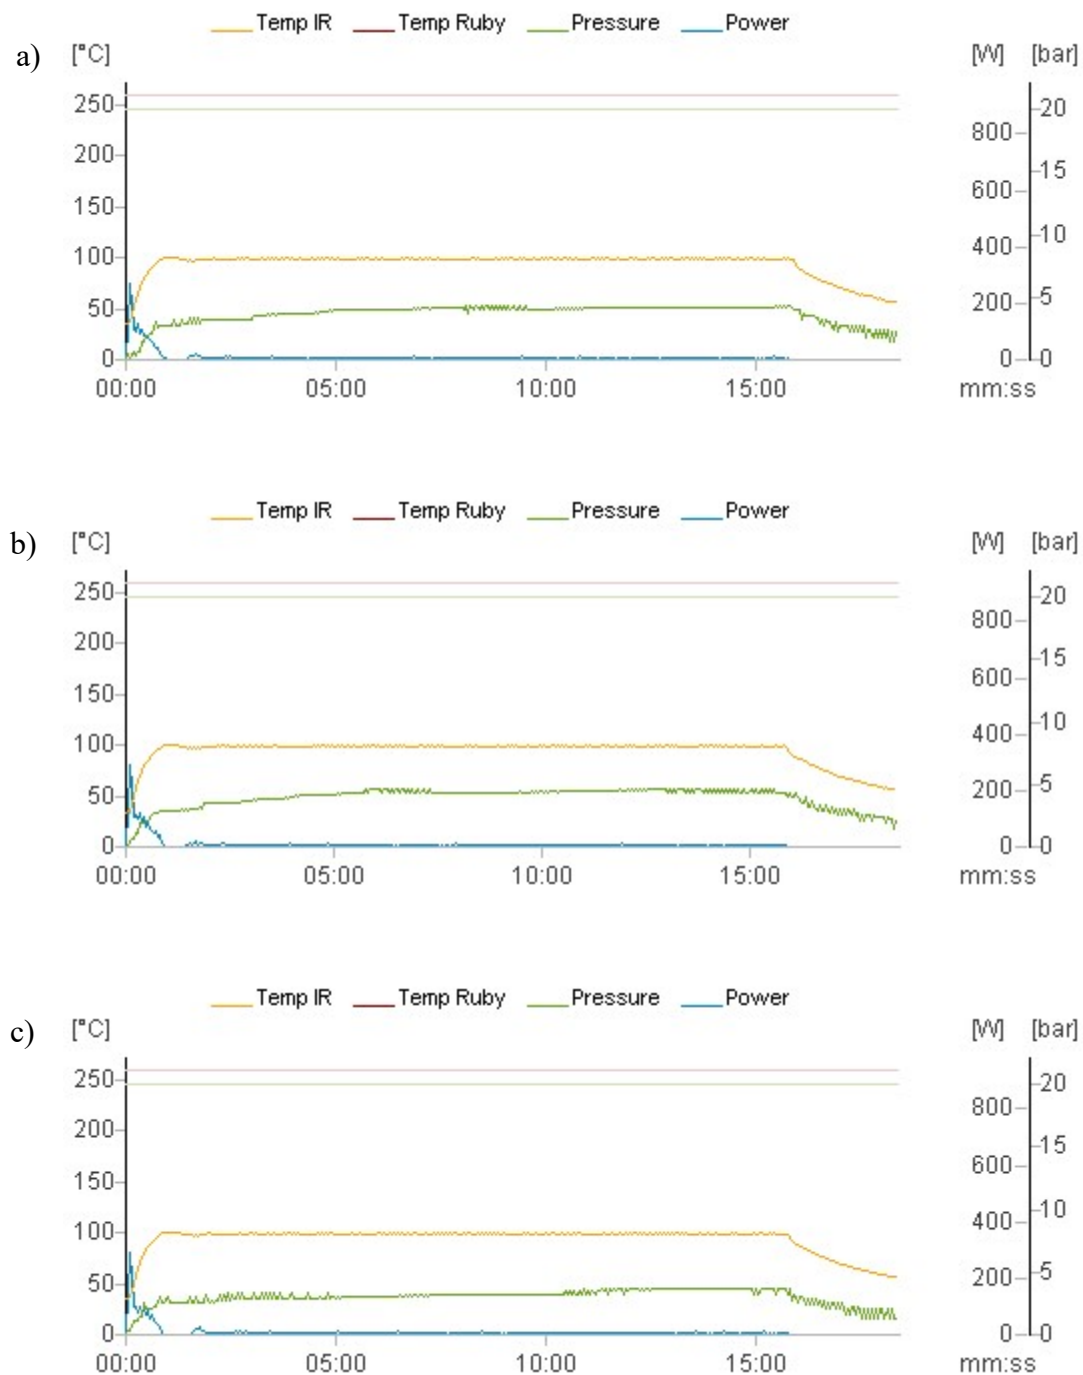

**Figure S1.** Temperature, applied power, and internal pressure profiles recorded during the microwave-assisted synthesis performed at a target temperature of 100 °C for 15 min for **1** (a), **2** (b) and **3** (c).

## Supporting Information

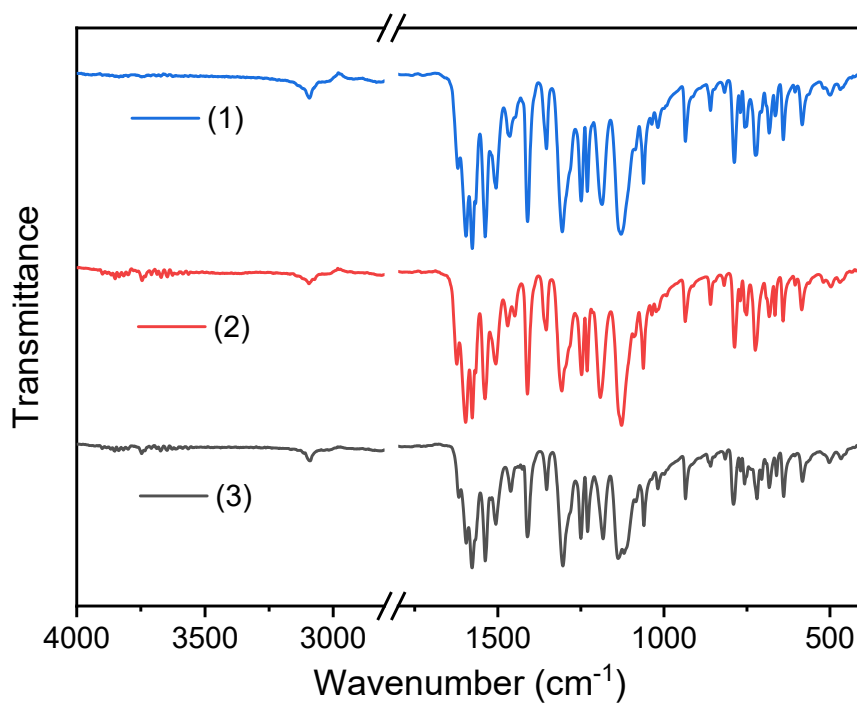

**Figure S2.** FTIR spectra for 1-3 complexes.

### 2. Structural Characterization

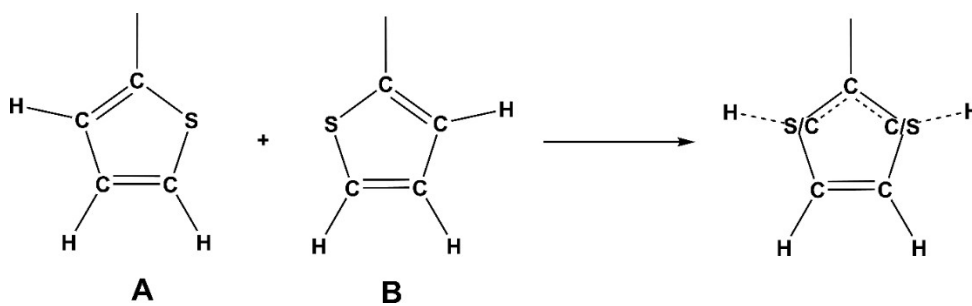

**Scheme S1.** Disorder on the thiophenyl groups.

## Supporting Information

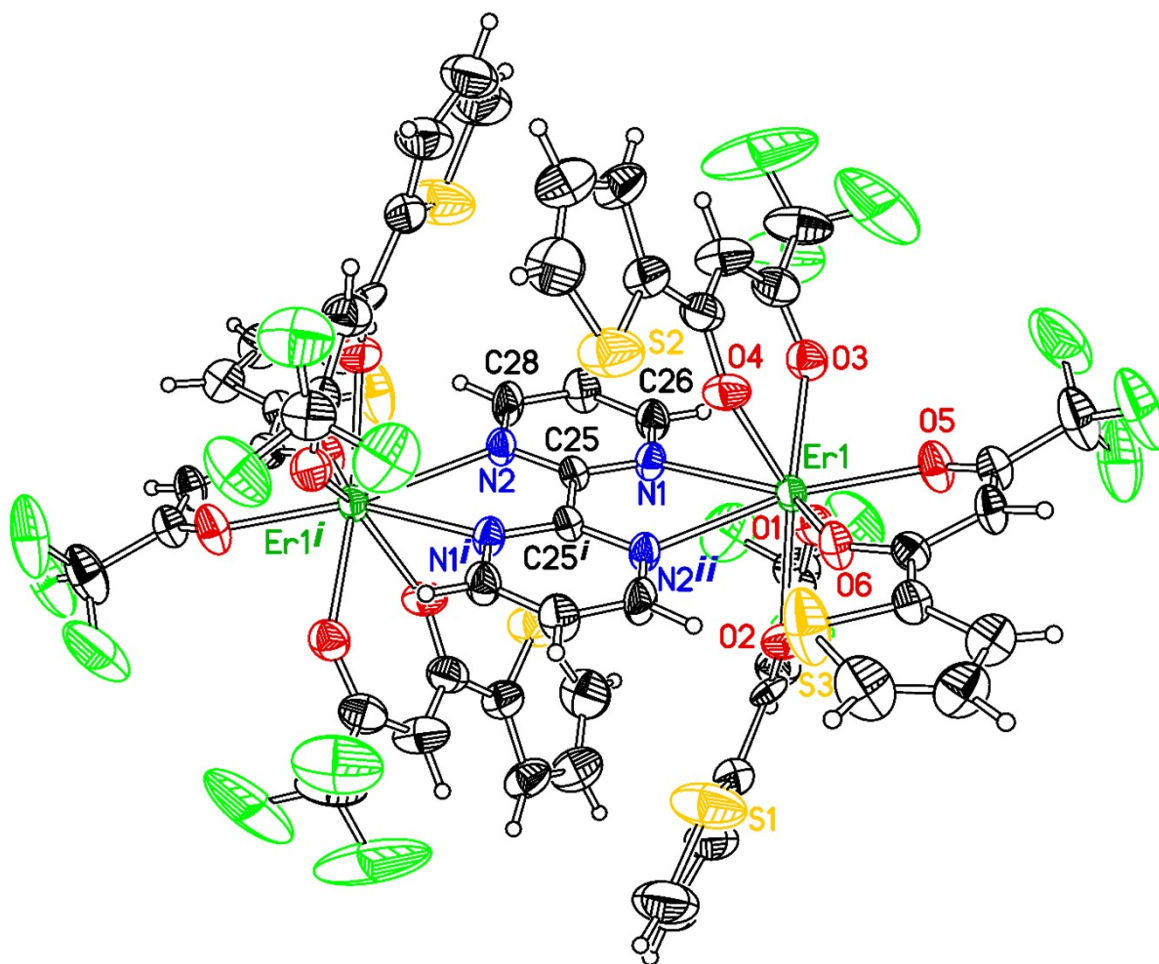

**Figure S3.** Molecular structure of **3** determined by single crystal X-rays diffraction. Displacement ellipsoids drawn at the 50% level of probability. Hydrogen atoms drawn as arbitrary radii spheres. Symmetry label: *i*: 1 - *x*, 1 - *y*, 1 - *z*.

## Supporting Information

**Table S1.** Crystal data and structure refinement details for **1** and **3**.

|                                                                             | <b>1</b>                             | <b>3</b>                     |
|-----------------------------------------------------------------------------|--------------------------------------|------------------------------|
| <b>CSD Deposit Code</b>                                                     | CCDC2338183                          | CCDC2419767                  |
| <b>FW/uma</b>                                                               | 1819.72                              | 909.86                       |
| <b>Formula</b>                                                              | $C_{56}H_{30}ErF_{18}N_4O_{12}S_6Yb$ | $C_{28}H_{15}ErF_9N_2O_6S_3$ |
| <b>T / K</b>                                                                | 296                                  | 296                          |
| <b>Crystal System</b>                                                       | Monoclinic                           | Monoclinic                   |
| <b>Space Group</b>                                                          | $P2_1/n$                             | $P2_1/c$                     |
| <b>a (Å)</b>                                                                | 13.6707(14)                          | 10.3989(4)                   |
| <b>b (Å)</b>                                                                | 14.1628(14)                          | 21.6815(8)                   |
| <b>c (Å)</b>                                                                | 17.7737(19)                          | 14.8024(5)                   |
| <b><math>\alpha</math> (°)</b>                                              | 90                                   | 90                           |
| <b><math>\beta</math> (°)</b>                                               | 97.682(4)                            | 106.318(1)                   |
| <b><math>\gamma</math> (°)</b>                                              | 90                                   | 90                           |
| <b>V (Å<sup>3</sup>)</b>                                                    | 3410.4(6)                            | 3203.0(2)                    |
| <b>Z(Z')</b>                                                                | 2(2)                                 | 2(4)                         |
| <b>d (g cm<sup>-3</sup>)</b>                                                | 1.766                                | 1.887                        |
| <b><math>\mu</math> (mm<sup>-1</sup>)</b>                                   | 2.74                                 | 2.91                         |
| <b>F(000)</b>                                                               | 1768.0                               | 1768.0                       |
| <b><math>\theta</math> range</b>                                            | 1.80 to 26.0                         | 1.70 to 26.0                 |
| <b>hkl range</b>                                                            | $-16 \leq h \leq 16$                 | $-12 \leq h \leq 12$         |
|                                                                             | $-17 \leq k \leq 17$                 | $-26 \leq k \leq 26$         |
|                                                                             | $-21 \leq l \leq 21$                 | $-18 \leq l \leq 18$         |
| <b>N<sub>tot</sub>, N<sub>uniq</sub> (R<sub>int</sub>), N<sub>obs</sub></b> | 25831, 6686(0.140), 3124             | 24746, 6291(0.028), 5904     |
| <b>Ref. Parameters</b>                                                      | 553                                  | 442                          |
| <b>GOF</b>                                                                  | 1.01                                 | 1.45                         |
| <b>R<sub>1</sub>, wR<sub>2</sub> (obs)</b>                                  | 0.060, 0.194                         | 0.061, 0.119                 |
| <b>Max. and min <math>\Delta\rho</math> e Å<sup>-3</sup></b>                | 1.01, -1.59                          | 1.29, -2.66                  |

## Supporting Information

**Table S2.** Selected bonds (Å) and angles (°) for **1**.

|                        |          |                        |           |
|------------------------|----------|------------------------|-----------|
| Er1—O3                 | 2.251(8) | Er1—O1                 | 2.279(8)  |
| Er1—O4                 | 2.255(8) | Er1—O6                 | 2.287(7)  |
| Er1—O2                 | 2.262(8) | Er1—N1                 | 2.540(9)  |
| Er1—O5                 | 2.264(7) | Er1—N2 <sup>i</sup>    | 2.544(10) |
|                        |          |                        |           |
| O3—Er1—O4              | 74.7(3)  | O5—Er1—O6              | 73.6(3)   |
| O3—Er1—O2              | 86.2(3)  | O1—Er1—O6              | 139.3(3)  |
| O4—Er1—O2              | 76.2(3)  | O3—Er1—N1              | 145.7(3)  |
| O3—Er1—O5              | 75.6(3)  | O4—Er1—N1              | 139.4(3)  |
| O4—Er1—O5              | 120.2(3) | O2—Er1—N1              | 103.3(3)  |
| O2—Er1—O5              | 149.9(3) | O5—Er1—N1              | 80.6(3)   |
| O3—Er1—O1              | 78.7(3)  | O1—Er1—N1              | 72.8(3)   |
| O4—Er1—O1              | 140.9(3) | O6—Er1—N1              | 73.5(3)   |
| O2—Er1—O1              | 73.9(3)  | O3—Er1—N2 <sup>i</sup> | 147.8(3)  |
| O5—Er1—O1              | 79.1(3)  | O4—Er1—N2 <sup>i</sup> | 78.5(3)   |
| O3—Er1—O6              | 121.4(3) | O2—Er1—N2 <sup>i</sup> | 70.2(3)   |
| O4—Er1—O6              | 79.6(3)  | O5—Er1—N2 <sup>i</sup> | 134.5(3)  |
| O2—Er1—O6              | 136.4(3) | O1—Er1—N2 <sup>i</sup> | 113.4(3)  |
| N1—Er1—N2 <sup>i</sup> | 64.0(3)  | O6—Er1—N2 <sup>i</sup> | 69.8(3)   |

Symmetry label: *i*: -x, -y, -z.

**Table S3.** Selected bonds (Å) and angles (°) for **3**.

|           |           |                        |            |
|-----------|-----------|------------------------|------------|
| Er1—O5    | 2.261(5)  | Er1—O6                 | 2.314(5)   |
| Er1—O4    | 2.282(6)  | Er1—O3                 | 2.314(6)   |
| Er1—O1    | 2.299(6)  | Er1—N1                 | 2.578(6)   |
| Er1—O2    | 2.303(6)  | Er1—N2 <sup>i</sup>    | 2.612(6)   |
|           |           |                        |            |
| O5—Er1—O4 | 104.5(2)  | O6—Er1—O3              | 130.2(2)   |
| O5—Er1—O1 | 87.2(2)   | O5—Er1—N1              | 146.93(19) |
| O4—Er1—O1 | 143.5(2)  | O4—Er1—N1              | 78.3(2)    |
| O5—Er1—O2 | 103.9(2)  | O1—Er1—N1              | 73.9(2)    |
| O4—Er1—O2 | 134.0(2)  | O2—Er1—N1              | 96.2(2)    |
| O1—Er1—O2 | 72.9(2)   | O6—Er1—N1              | 137.57(19) |
| O5—Er1—O6 | 73.61(19) | O3—Er1—N1              | 73.5(2)    |
| O4—Er1—O6 | 78.0(2)   | O5—Er1—N2 <sup>i</sup> | 149.87(19) |
| O1—Er1—O6 | 138.3(2)  | O4—Er1—N2 <sup>i</sup> | 67.5(2)    |
| O2—Er1—O6 | 76.3(2)   | O1—Er1—N2 <sup>i</sup> | 116.9(2)   |
| O5—Er1—O3 | 76.0(2)   | O2—Er1—N2 <sup>i</sup> | 69.7(2)    |
| O4—Er1—O3 | 72.7(2)   | O6—Er1—N2 <sup>i</sup> | 76.28(18)  |
| O1—Er1—O3 | 77.1(2)   | O3—Er1—N2 <sup>i</sup> | 124.67(19) |
| O2—Er1—O3 | 150.0(2)  | N1—Er1—N2 <sup>i</sup> | 62.24(19)  |

Symmetry label: *i*: 1 - x, 1 - y, 1 - z.

## Supporting Information

**Table S4.** The CShM values calculated by SHAPE 2.1 for **1** and  $[\{\text{Yb}(\text{tta})_3\}_2(\mu^2\text{-bpm})]$ .<sup>1</sup>

| Coordination Geometry                                   | <b>1</b>     | $[\{\text{Yb}(\text{tta})_3\}_2(\mu^2\text{-bpm})]$ |
|---------------------------------------------------------|--------------|-----------------------------------------------------|
| Octagon ( $D_{8h}$ )                                    | 29.420       | 29.739                                              |
| Heptagonal pyramid ( $C_{7v}$ )                         | 21.867       | 21.755                                              |
| Hexagonal bipyramid ( $D_{6h}$ )                        | 16.274       | 16.402                                              |
| Cube ( $O_h$ )                                          | 9.537        | 9.921                                               |
| Square antiprism ( $D_{4d}$ )                           | <b>0.538</b> | <b>0.424</b>                                        |
| Triangular dodecahedron ( $D_{2d}$ )                    | 2.185        | 2.596                                               |
| Johnson gyrobifastigium J26 ( $D_{2d}$ )                | 15.715       | 16.966                                              |
| Johnson elongated triangular bipyramid J14 ( $D_{3h}$ ) | 27.973       | 28.188                                              |
| Biaugmented trigonal prism J50 ( $C_{2v}$ )             | 2.377        | 2.968                                               |
| Biaugmented trigonal prism ( $C_{2v}$ )                 | 1.831        | 2.337                                               |
| Snub diphonoid J84 ( $D_{2d}$ )                         | 5.032        | 5.559                                               |
| Triakis tetrahedron ( $T_d$ )                           | 10.289       | 10.756                                              |
| Elongated trigonal bipyramid ( $D_{3h}$ )               | 23.907       | 24.573                                              |

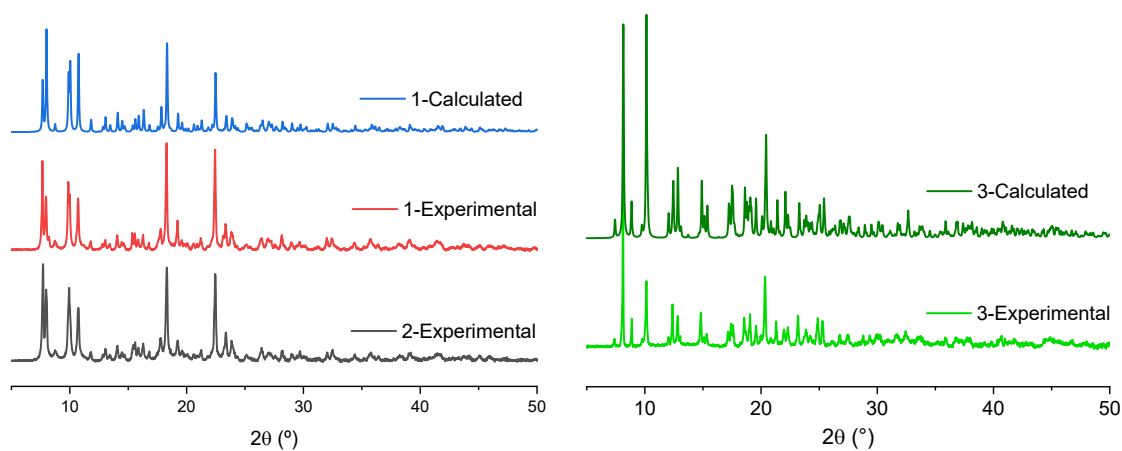

**Figure S4.** Comparison between experimental and calculated powder X-ray diffraction (PXRD) patterns for **1** and **2** (left panel) and **3** (right panel).

## Supporting Information

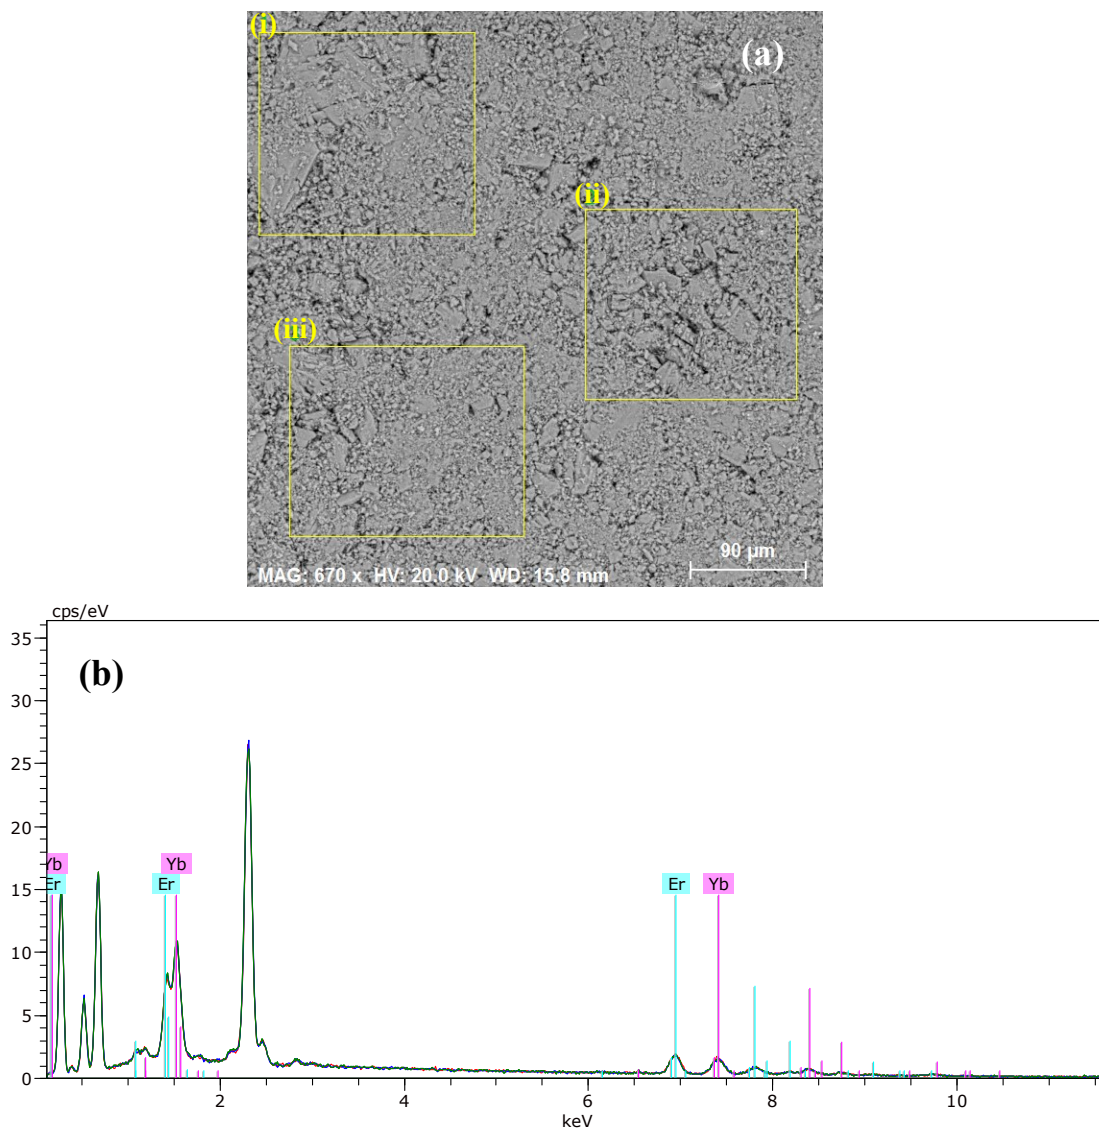

**Figure S5.** (a) SEM image for **1** displaying three selected areas and the corresponding (b) EDX spectrum for these areas: i(blue), ii(red) and iii(green).

**Table S5.** EDX determination of mass percent (%) of Yb<sup>3+</sup> and Er<sup>3+</sup> in **1**.

| Spectrum   | Mass percent (%) |                  |
|------------|------------------|------------------|
|            | Er <sup>3+</sup> | Yb <sup>3+</sup> |
| 1          | 48.04            | 51.96            |
| 2          | 50.18            | 49.82            |
| 3          | 50.19            | 49.81            |
| Mean value | 49.47            | 50.53            |
| Sigma      | 1.24             | 1.24             |
| Sigma mean | 0.72             | 0.72             |

## Supporting Information

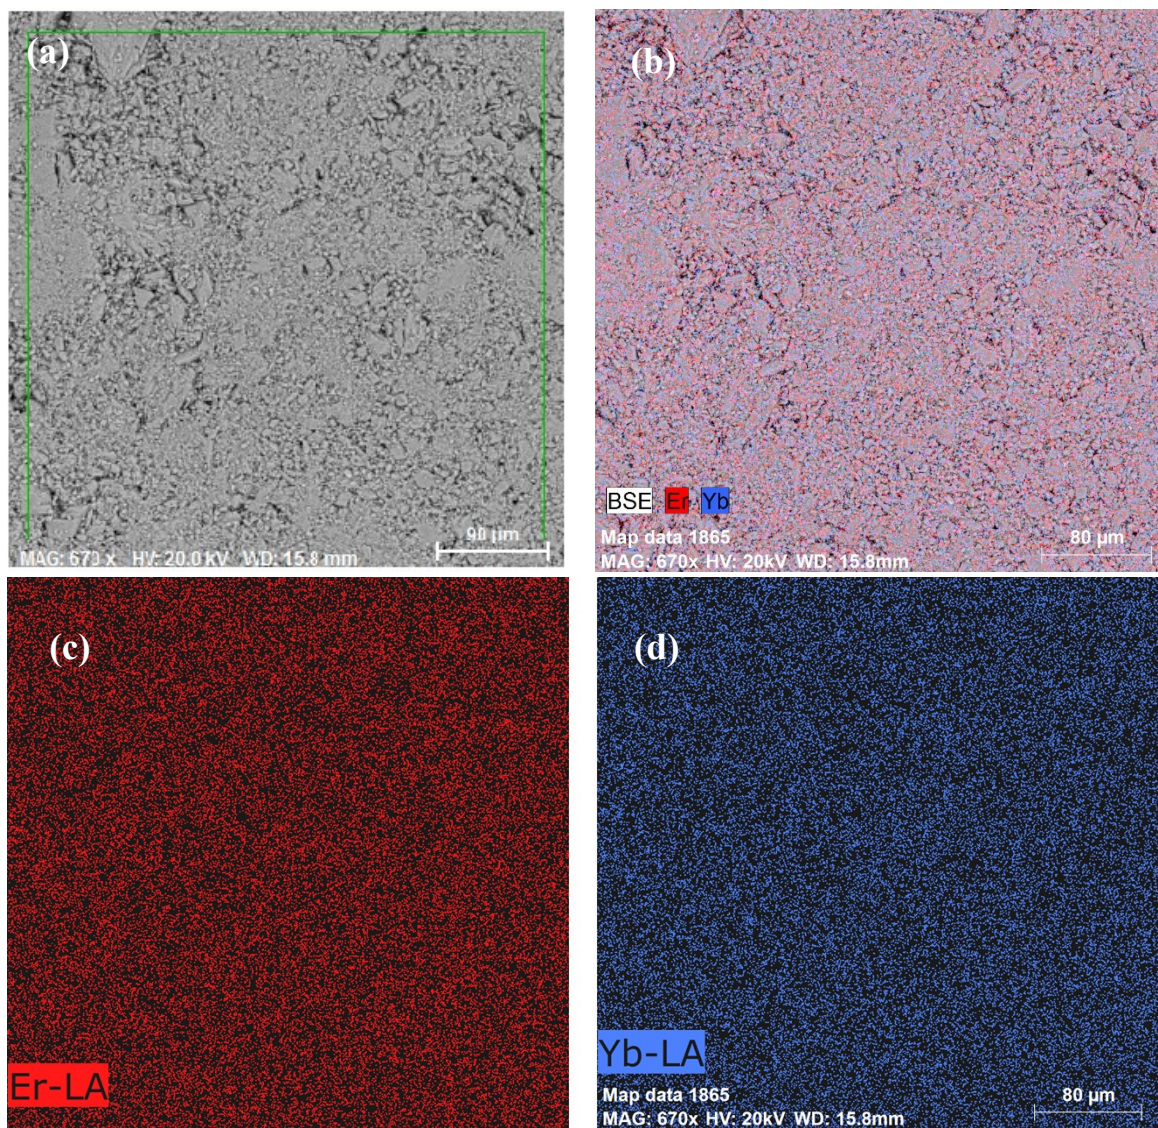

**Figure S6.** (a) SEM image and (b-d) SEM-EDX mapping of **1**.

## Supporting Information

### Electrospray ionization mass spectrometry (ESI-MS)

The MS measurements were performed under soft ionization conditions (fragmentation energy of 10 eV), selected to preserve the molecular ion. For all the reported complexes, the ESI-MS spectra display signals corresponding to the isotopic distribution of the dinuclear species, detected as the ammonium adduct  $[M + \text{NH}_4]^+$ :  $m/z$  1841.8802 (**1**), 1849.8982 (**2**), and 1837.8793 (**3**) (Figure S7-S9). The observation of these dinuclear signals confirms the integrity of the dinuclear complexes under the applied ionization conditions, although it does not constitute direct evidence of their thermodynamic stability in solution.

For clarity, a full ESI-MS spectrum of **1** is shown in Figure S10 and peak assignments are summarized in Table S6. In addition to the molecular ion of the heterodinuclear complex (**1**), detected as the ammonium adduct  $[M + \text{NH}_4]^+$ , several intense lower- $m/z$  signals are observed and can be rationalized in terms of stepwise fragmentation of the heterodinuclear complex under the applied ESI conditions (see Experimental Section). A prominent fragment at  $m/z$  1602.8569 (relative intensity 63.9%) is assigned to the heterodinuclear complex after the loss of one tta ligand, consistent with partial ligand dissociation while preserving the dinuclear metal framework. At lower  $m/z$ , an intense peak at  $m/z$  1006.9833 (relative intensity 77.1%) is tentatively assigned to the mononuclear fragment  $[\text{Er}(\text{bpm})(\text{tta})_3 + \text{NH}_4]^+$ , arising from further dissociation of the dinuclear complex. Finally, the signal at  $m/z$  767.9617 (relative intensity 35.7%) is tentatively attributed to the cationic fragment  $[\text{Er}(\text{bpm})(\text{tta})_2]^+$ . The relative intensities of these peaks are influenced by ionization and fragmentation processes and should therefore not be interpreted quantitatively.

A comparison of the isotopic patterns in the molecular-ion region of the heterodinuclear complex **1** and the corresponding homodinuclear analogues **2** and **3** are shown in Figure S11, together with the calculated isotopic distribution for the  $[M + \text{NH}_4]^+$  ion of **1**. The experimental isotopic envelope of **1** shows excellent agreement with the calculated pattern and is clearly dominated by the heterodinuclear species. Minor contributions matching the isotopic pattern of the homodinuclear complexes are only observed in the expanded region. Such minor features have been reported for related heterodinuclear lanthanide coordination assemblies and have been attributed to partial metal-ion scrambling processes associated with the intrinsic lability of Ln-ligand interactions.<sup>2, 3</sup> The comparison further supports the

## Supporting Information

assignment of the heterodinuclear complex and illustrates the sensitivity of ESI-MS to detect closely related dinuclear species.

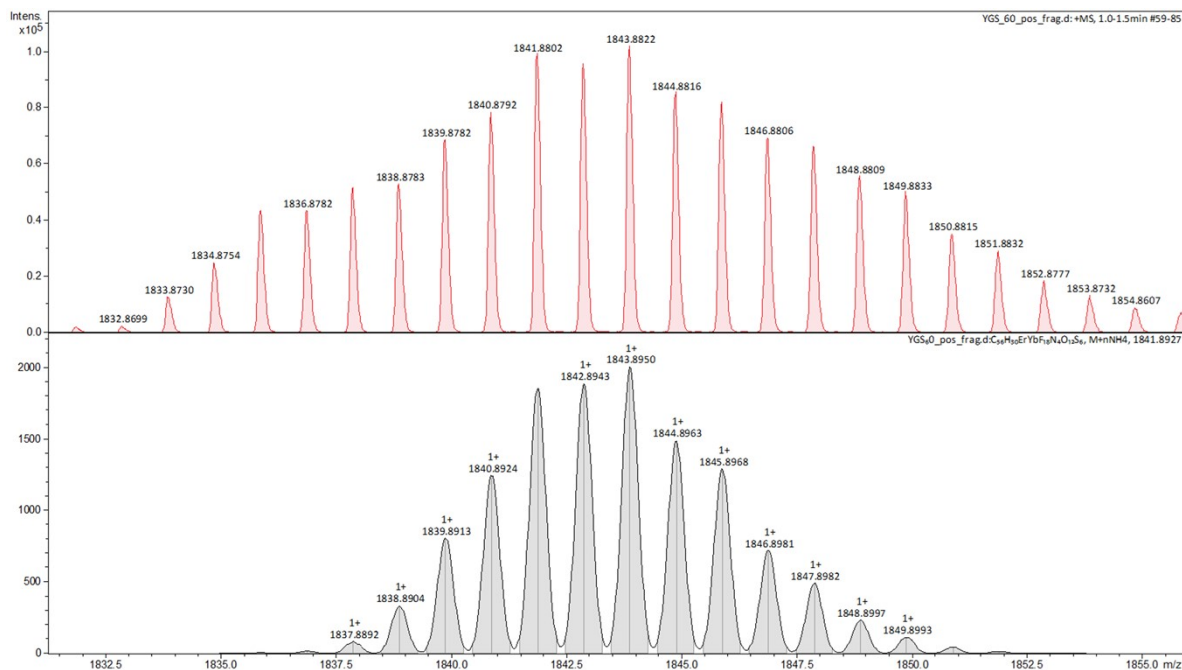

**Figure S7.** Selected region of the experimental ESI-MS spectra of compound **1** (top), and calculated signals corresponding to [M+NH<sub>4</sub>]<sup>+</sup> ion (bottom).

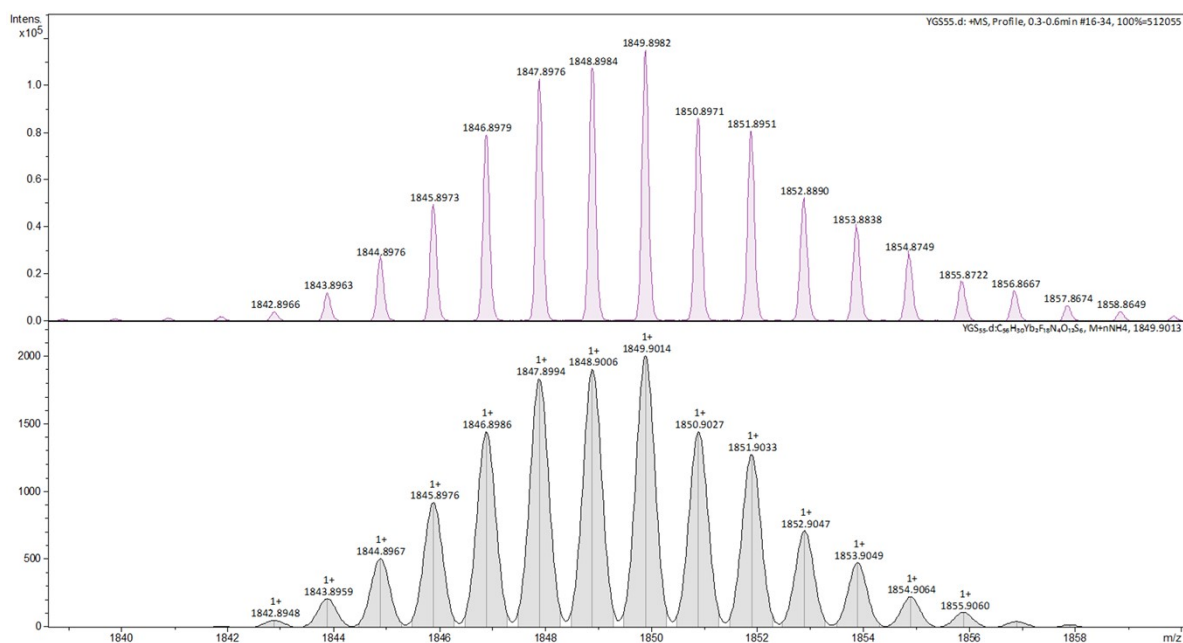

## Supporting Information

**Figure S8.** Selected region of the experimental ESI-MS spectra of compound **2** (top), and calculated signals corresponding to  $[M+NH_4]^+$  ion (bottom).

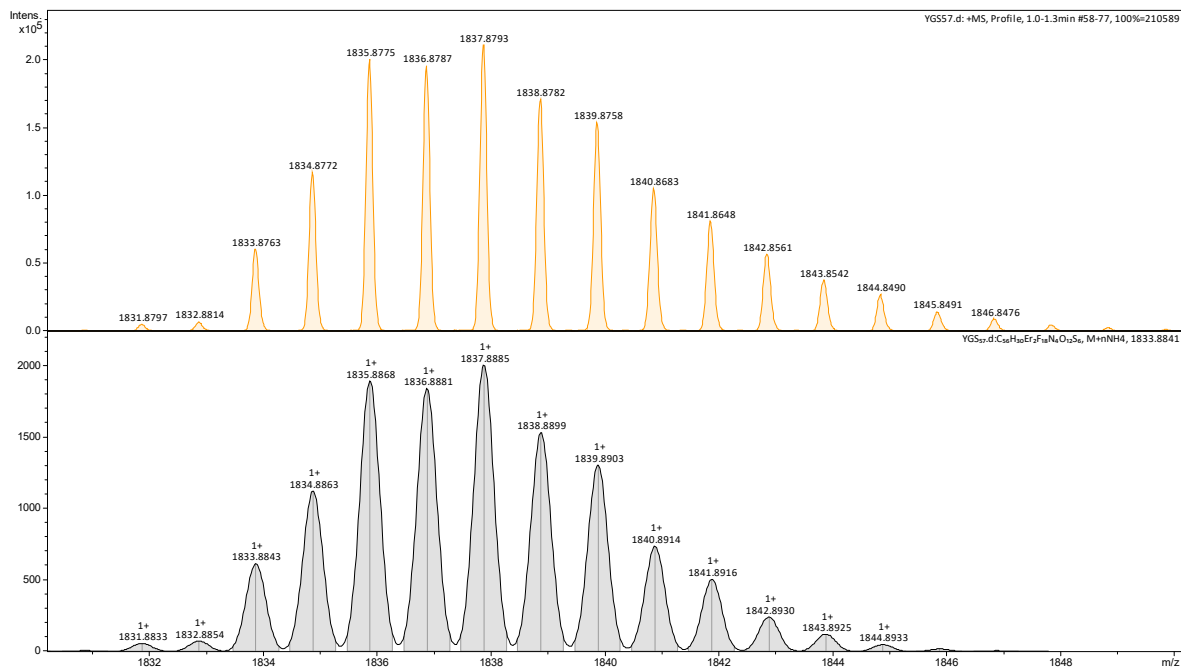

**Figure S9.** Selected region of the experimental ESI-MS spectra of compound **3** (top), and calculated signals corresponding to  $[M+NH_4]^+$  ion (bottom).

## Supporting Information

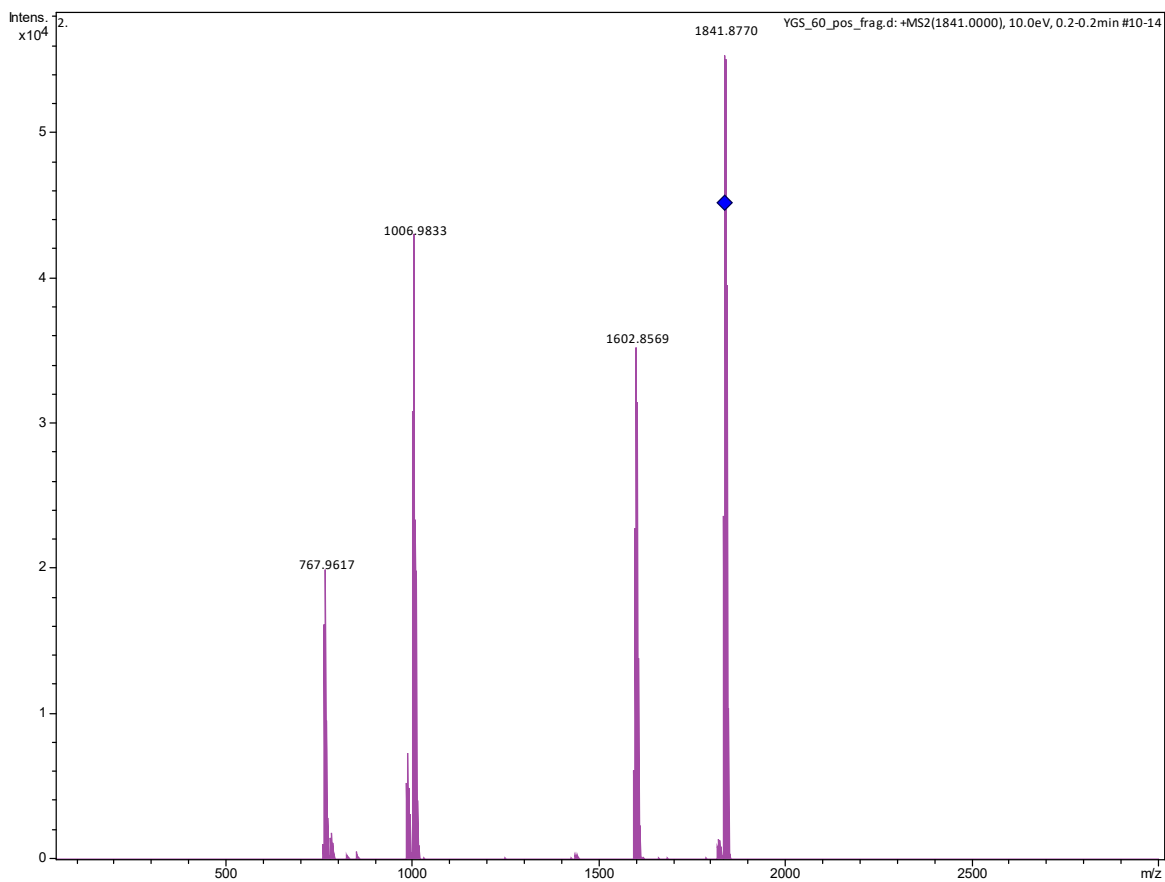

**Figure S10.** Full ESI-MS spectrum of **1** recorded under soft ionization conditions (fragmentation energy of 10 eV). The main observed peaks and their assignments are summarized in Table S6.

**Table S6.** Observed  $m/z$  values, relative intensities, and tentative assignments of the main ions detected in the ESI-MS spectrum of **1**.

| <b>m/z (obs.)</b> | <b>Assignment</b>                                       | <b>Relative intensity (%)</b> |
|-------------------|---------------------------------------------------------|-------------------------------|
| 1841.8770         | $[M + \text{NH}_4]^+$                                   | 100                           |
| 1602.8569         | $[M - \text{tta}]^+$                                    | 63.9                          |
| 1006.9833         | $[\text{Er}(\text{bpm})(\text{tta})_3 + \text{NH}_4]^+$ | 77.1                          |
| 767.9617          | $[\text{Er}(\text{bpm})(\text{tta})_2]^+$               | 35.7                          |

*M* denotes the heterodinuclear complex  $[\{\text{Yb}(\text{tta})_3\}(\mu_2\text{-bpm})\{\text{Er}(\text{tta})_3\}]$ .

## Supporting Information

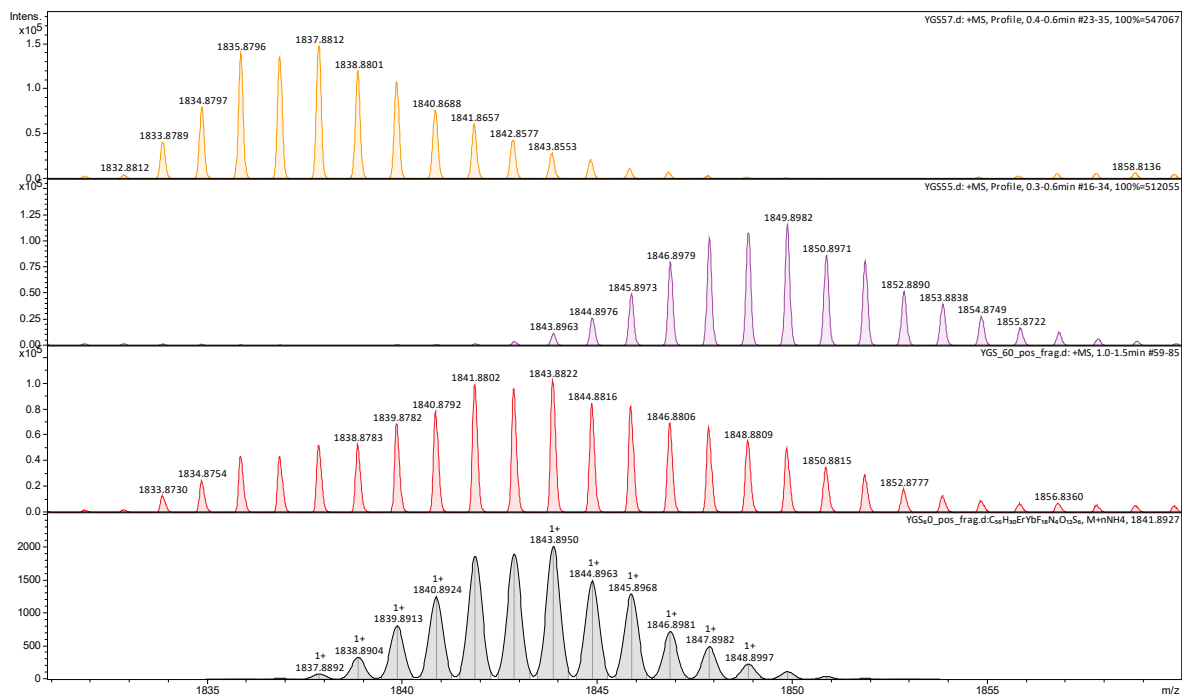

**Figure S11.** Comparison of the selected region of the experimental ESI-MS spectra of compound **1** (red), **2** (purple), **3** (yellow) and calculated signals corresponding to  $[M+NH_4]^+$  ion (gray).

## Supporting Information

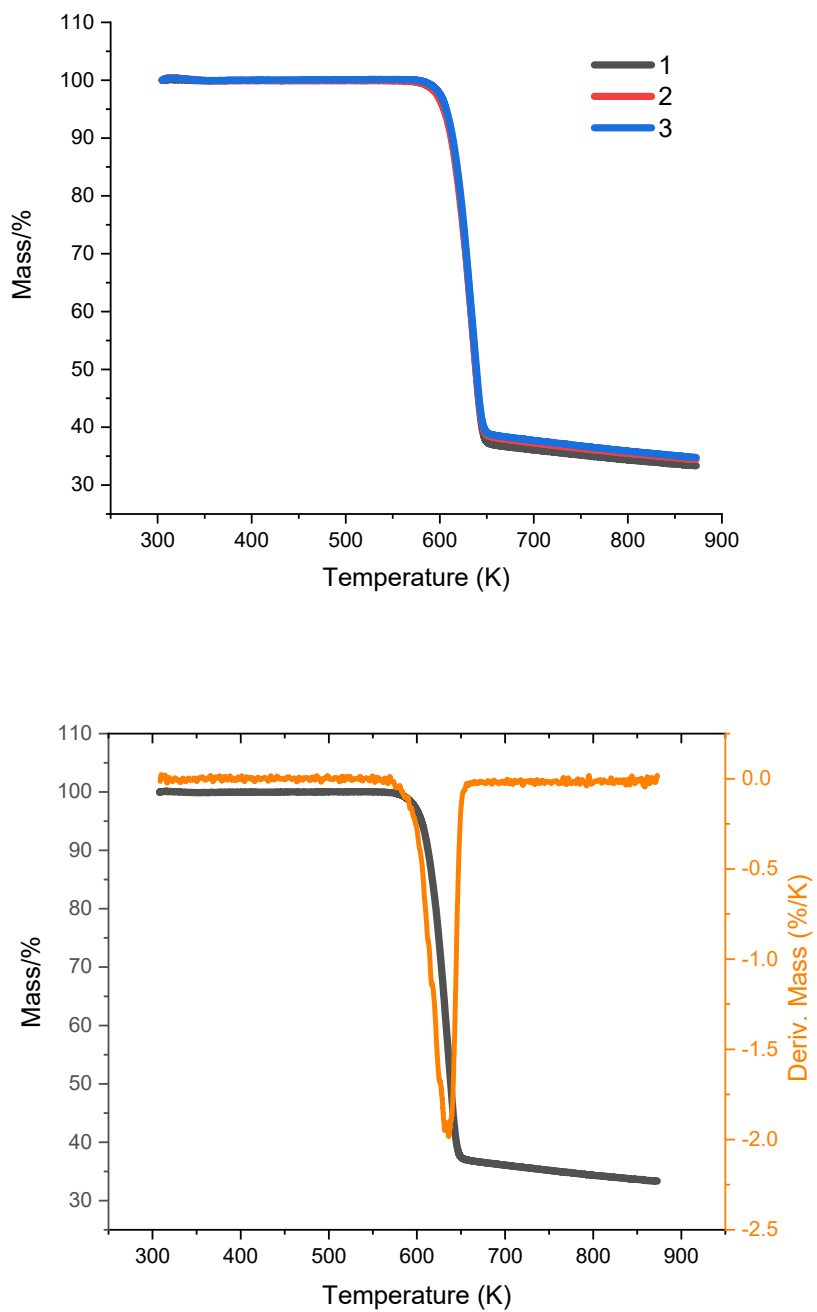

**Figure S12.** TGA for complexes **1-3** (top) and TGA/DTA for **1** (bottom).

## Supporting Information

### 3. Photoluminescence Characterization

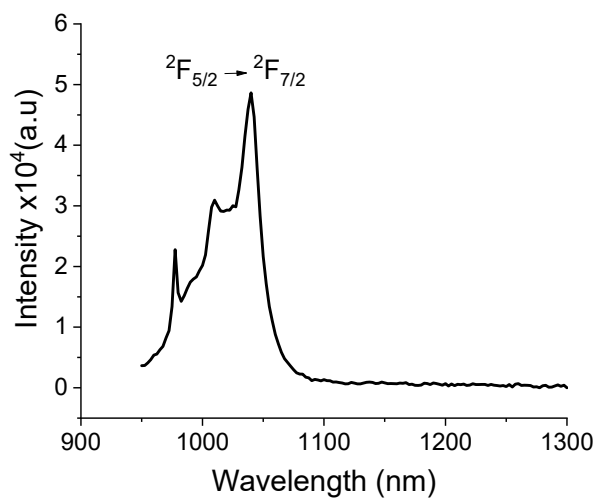

**Figure S13.** Near-infrared emission spectra for **2** upon 394 nm excitation at room temperature.

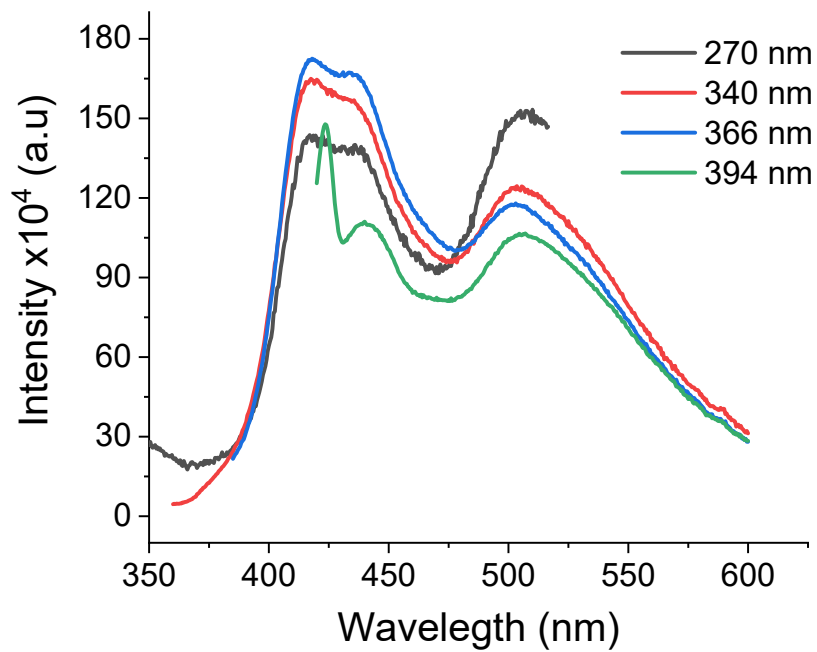

**Figure S14.** Solid-emission spectra of  $[\text{Gd}(\text{tta})_3]_2(\mu^2\text{-bpm})$  recorded at room temperature and using different excitation wavelengths.

## Supporting Information

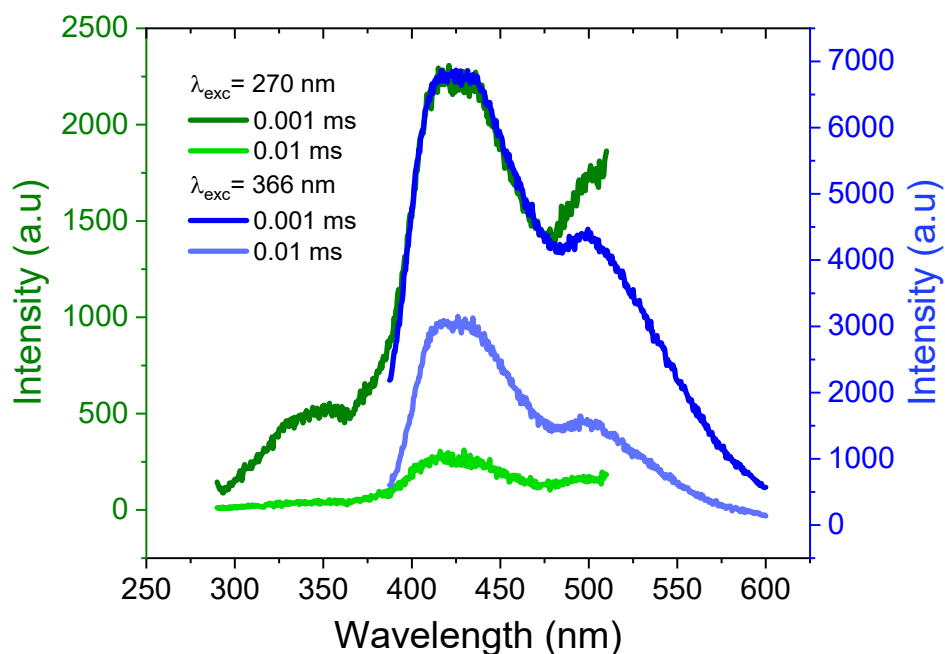

**Figure S15.** Phosphorescence spectra of [ $\{\text{Gd}(\text{tta})_3\}_2(\mu^2\text{-bpm})$ ] recorded at 270 nm (green) and 366 nm (blue) excitation at 16.5 K and  $P= 5.6 \times 10^{-5}$  mbar and using different delay times.

### 4. Thermometric Characterization

The integrated areas of the  $\text{Yb}^{3+}$  ( $^2\text{F}_{5/2} \rightarrow ^2\text{F}_{7/2}$ ) and  $\text{Er}^{3+}$  ( $^4\text{I}_{13/2} \rightarrow ^4\text{I}_{15/2}$ ) bands of (**1**) were performed using MatLab® software. The uncertainties in the integrated areas of these bands ( $\delta I_i$ ) were calculated from the emission spectra evaluating the signal-to-noise ratio ( $\text{SNR} = \text{signal}/\text{noise}$ ). For this, the signal fluctuations (standard deviation, considered as the noise) was determined from the emission spectra in the 1350-1400 nm range. Thus:

$$\delta I_i = \frac{1}{\text{SNR}} I_i \quad \text{S1}$$

where  $i = \text{Yb}^{3+}$  or  $\text{Er}^{3+}$ . The uncertainty in  $\Delta$  is defined as:

$$\delta \Delta = \Delta \times \sqrt{\left(\frac{\delta I_{\text{Yb}}}{I_{\text{Yb}}}\right)^2 + \left(\frac{\delta I_{\text{Er}}}{I_{\text{Er}}}\right)^2} \quad \text{S2}$$

On the other hand, a spectral deconvolution procedure using OriginLab© software was implemented to calculate the integrated areas of the Stark splitting of  $\text{Yb}^{3+}$  ( $^2\text{F}_{5/2} \rightarrow ^2\text{F}_{7/2}$ ) transition for **1** and **2**. In the case of the areas of  $\text{Er}^{3+}$  ( $^2\text{H}_{11/2} \rightarrow ^4\text{I}_{15/2}$ ) and ( $^4\text{S}_{3/2} \rightarrow ^4\text{I}_{15/2}$ ) bands for **1** and **3**, were calculated from the numerical integration in the  $18622\text{-}19474 \text{ cm}^{-1}$  and  $17529\text{-}18622 \text{ cm}^{-1}$  range, respectively. First, a

## Supporting Information

baseline subtraction to remove the spectrometer electric noise was done, followed by the conversion of the signal of each emission spectrum from wavelength to energy units by applying the Jacobian transformation.<sup>4</sup> On the other hand, the relative uncertainty on  $\Delta$  ( $\delta\Delta/\Delta$ ) was considered as the noise-to-signal ratio (SNR) of the emission spectra resulting in a minimum  $\delta\Delta/\Delta$  of 0.7%.

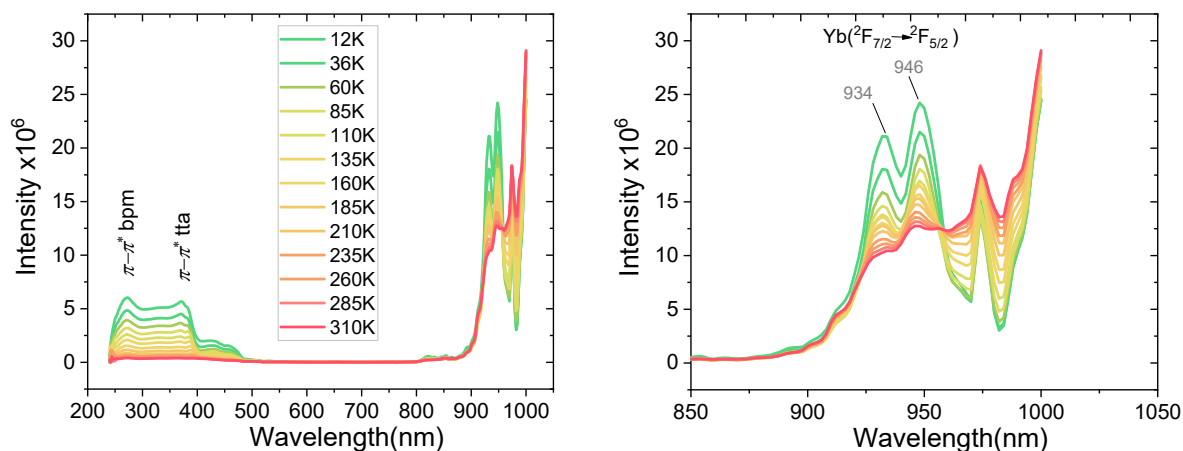

**Figure S16.** (Left) Excitation spectrum as function of the temperature for **1** monitoring 1040 nm emission band. (Right) Enlarged view in the range of 850-1050 nm.

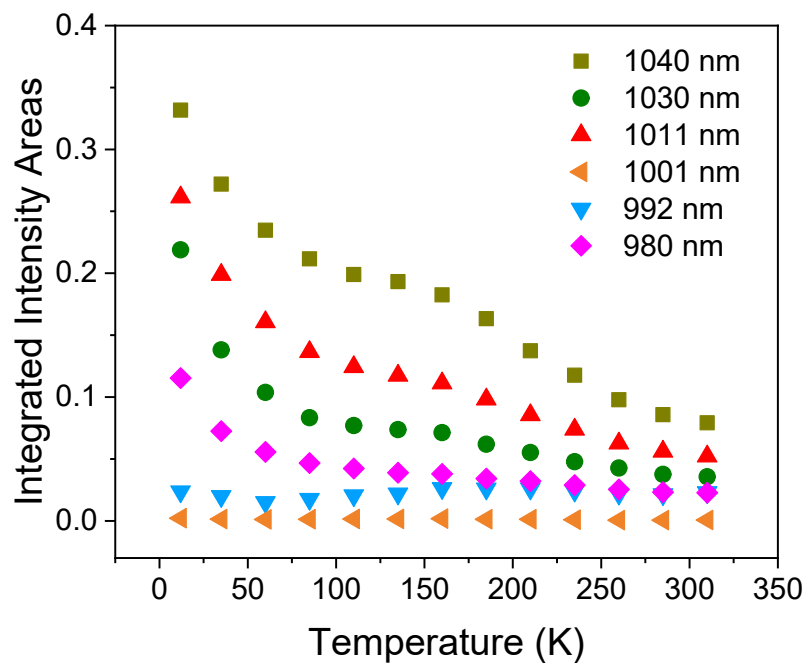

**Figure S17.** The temperature dependence of the integrated areas of the Stark components for the  $\text{Yb}^{3+}$  ( ${}^2\text{F}_{5/2} \rightarrow {}^2\text{F}_{7/2}$ ) transition in **1**.

## Supporting Information

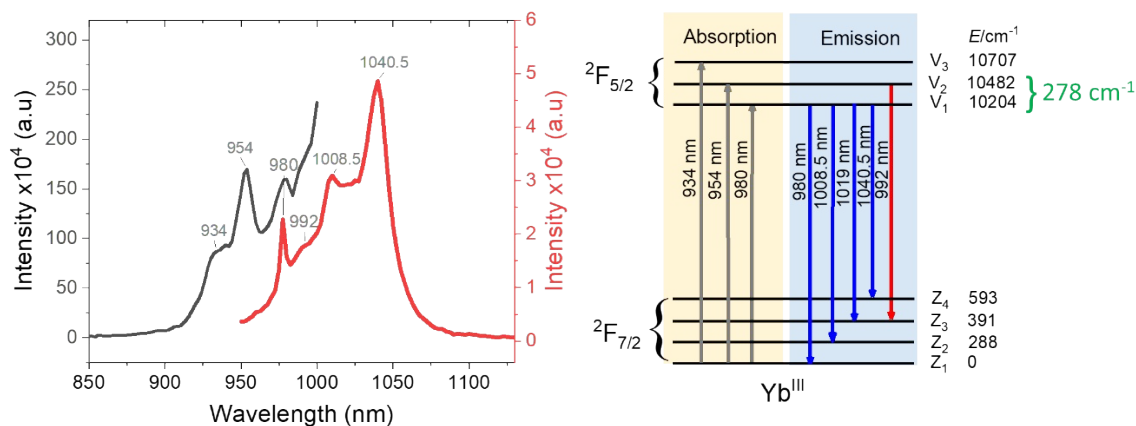

**Figure S18.** (Left) Solid-state excitation spectra monitoring 1040 nm emission band (black) and emission spectra upon 394 nm excitation (red) at room temperature for complex **2**. (Right) Energy level diagram for the  $\text{Yb}^{3+}$  ( ${}^2\text{F}_{5/2} \rightarrow {}^2\text{F}_{7/2}$ ) transition in **2**.

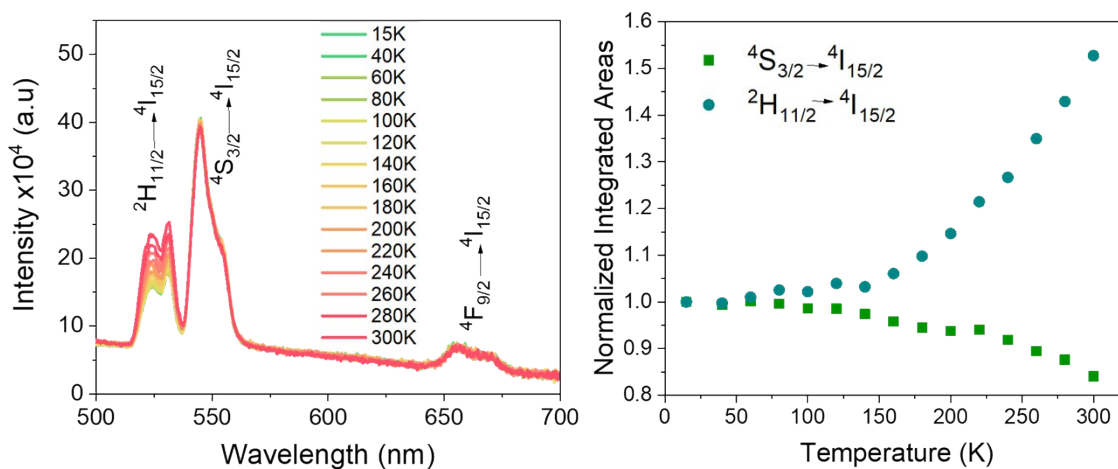

**Figure S19.** (Left) Solid-state visible emission spectra for **3** upon 394 nm excitation at different temperatures (from 15 to 300 K). (Right) Temperature dependence of the normalized integrated areas of the bluish green ( ${}^2\text{H}_{11/2} \rightarrow {}^4\text{I}_{15/2}$ ) and green ( ${}^4\text{S}_{3/2} \rightarrow {}^4\text{I}_{15/2}$ ) bands of  $\text{Er}^{3+}$  ion in **3**.

## Supporting Information

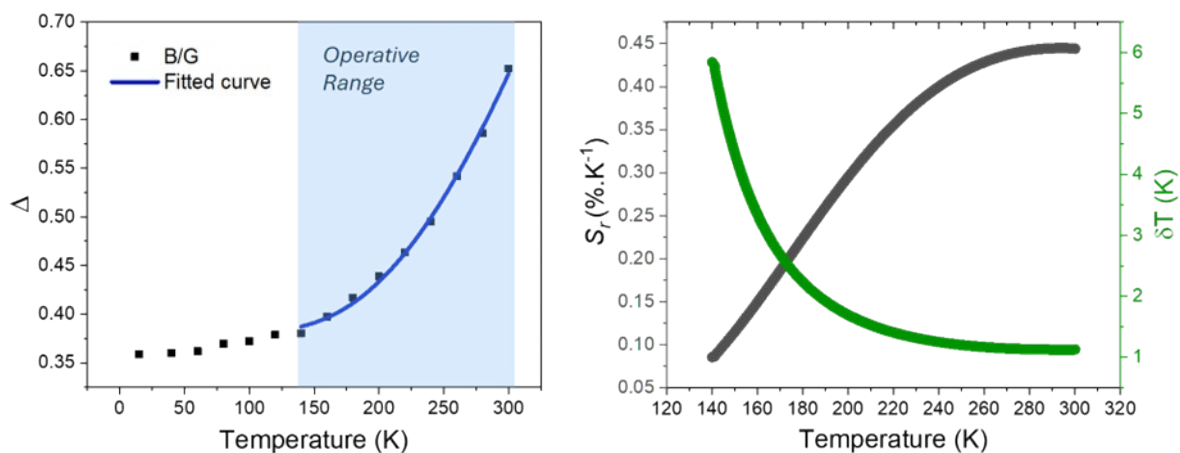

**Figure S20.** (Left) Temperature dependence of  $\Delta$  defined as the ratio between the integrated areas of bluish green and green  $\text{Er}^{3+}$  bands for **3**, and (Right) the corresponding relative sensitivity ( $S_r$ ) and temperature uncertainty ( $\delta T$ ). The blue area depicts the operative temperature range, and the blue line represents the best fit to the experimental data (fit details in Table S7).

## Supporting Information

**Table S7.** Summary of the fitting parameters for the plots of complexes **1**, **2** and **3**.

| Plot            | Exponential                                            | y0                 | A1                   | t1                | A2             | t2                 |
|-----------------|--------------------------------------------------------|--------------------|----------------------|-------------------|----------------|--------------------|
| Figure 4c       | $y = A1 \cdot \exp(-x/t1) + A2 \cdot \exp(-x/t2) + y0$ | -2.14 ±<br>2.28    | 9.86 ±<br>2.28       | 21.28 ±<br>7.91   | 8.44 ±<br>1.38 | 312.96 ±<br>177.21 |
|                 | Linear                                                 | A                  | B                    |                   |                |                    |
| Figure 5c       | $y = A + B \cdot x$                                    | 0.004 ±<br>8.32E-4 | 3.54E-4 ±<br>6.35E-6 |                   |                |                    |
|                 | Boltzmann (eq. 4)                                      | ln(B)              | -ΔE/k <sub>B</sub>   |                   |                |                    |
| Figure 6c       | $\ln(y) = \ln(B) - \frac{\Delta E}{k_B T}$             | -0.24 ±<br>0.02    | -437.66 ±<br>3.97    |                   |                |                    |
|                 | Quasi-Boltzmann (eq. 6)                                | A                  | B                    | ΔE                |                |                    |
| Figure 7c       | $y = A + B \cdot \exp(-\Delta E / K_B \cdot T)$        | 0.41 ±<br>0.005    | 5.53 ±<br>0.82       | 626.59 ±<br>32.40 |                |                    |
| Figure S20-left |                                                        | 0.38 ±<br>0.005    | 6.80 ±<br>1.36       | 675.71 ±<br>43.06 |                |                    |

## Supporting Information

### 5. Theoretical calculations

Density Functional Theory (DFT) calculations were employed to investigate the structural and electronic properties of the system, including the ground-state molecular geometry and the molecular orbital compositions of the excited singlet and triplet states involved in the energy transfer process. Geometry optimizations were performed using the Gaussian 16 software package,<sup>5</sup> applying the M06-L functional.<sup>6, 7</sup> The Def2-SVP basis set was used for hydrogen, carbon, and nitrogen atoms,<sup>8</sup> while the lanthanide ions ( $\text{Ln}^{3+} = \text{Er}^{3+}$  or  $\text{Yb}^{3+}$ ) were treated with the MWB57 or MWB59 basis sets, respectively.<sup>9, 10</sup> These basis sets include effective core potentials that account for 57 or 59 core electrons, along with their corresponding valence basis sets for the lanthanide ions.

Figure S21 shows the superposition of the DFT-optimized structure (represented by pink spheres) with the crystallographic structure of complex **1**. The calculated geometry is in agreement with the experimental data, with root-mean-square deviations (RMSD) of 0.302 Å when considering only the coordination polyhedra and 1.183 Å for the entire molecule.

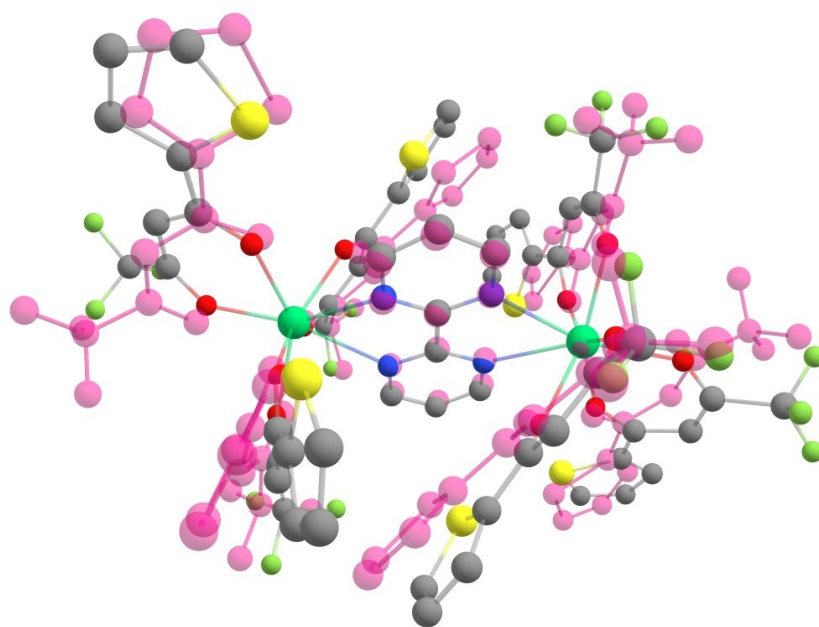

**Figure S21.** Superposition of the DFT-optimized structure (pink spheres) and the crystallographic structure (coloured atoms) of complex **1**. RMSD values are 0.302 Å for the coordination polyhedra and 1.183 Å for the full structure.

Time-dependent density functional theory (TD-DFT) calculations revealed distinct characteristics for the excited states involved in the energy transfer process. Notably, two triplet states were identified: a lower-energy triplet ( $T_1$ ) predominantly localized on the tta ligands, and a higher-energy triplet ( $T_2$ ) mainly centred on the bpm ligand. In contrast, the first excited singlet state ( $S_1$ ) exhibits a more

## Supporting Information

delocalized character, with molecular orbital contributions distributed across the entire complex, without a clear preference for a specific ligand type. These spatial distributions of the occupied and unoccupied molecular orbitals associated with  $S_1$ ,  $T_2$  (bpm), and  $T_1$  (tta) are illustrated in Figure S22.

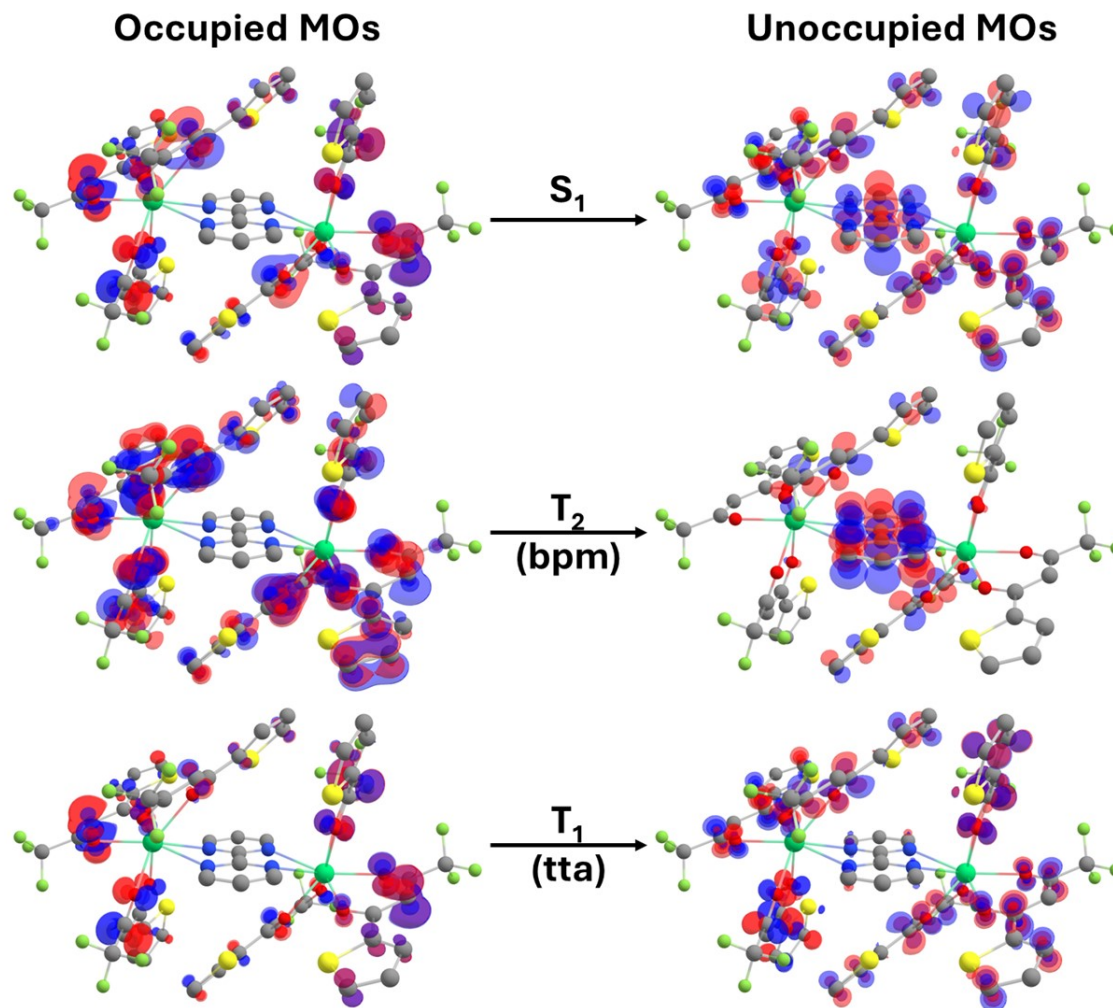

**Figure S22.** Molecular orbitals (MOs) involved in the  $S_1$ ,  $T_2$  (bpm), and  $T_1$  (tta) excited states. Occupied orbitals are shown on the left and unoccupied orbitals on the right, highlighting the localization of each state. Isosurfaces generated with  $0.05 e/a_0^3$ .

Based on the TD-DFT results, we calculated the donor–acceptor (ligand-to- $\text{Ln}^{3+}$ ) distances associated with the  $S_1$ ,  $T_2$ , and  $T_1$  states, following the methodology described in reference.<sup>11</sup> The individual and average values of these distances, along with the corresponding excitation energies, are summarized in Table S8.

## Supporting Information

**Table S8.** Ligand excited states, their calculated excitation energies, and corresponding donor–acceptor ( $R_L$ ) distances. Oscillator strengths ( $f_{\text{osc}}$ ) are provided for the singlet transitions and considered in the average values of energy and  $R_L$ .

| State                      | Energy (nm)                          | $R_L$ (Å) |
|----------------------------|--------------------------------------|-----------|
| S <sub>1</sub> (tta + bpm) | 422.65 ( $f_{\text{osc}} = 0.0103$ ) | 5.75      |
|                            | 403.23 ( $f_{\text{osc}} = 0.0152$ ) | 4.46      |
|                            | 402.21 ( $f_{\text{osc}} = 0.0134$ ) | 5.82      |
| Average                    | 408.02                               | 5.27      |
| T <sub>2</sub> (bpm)       | 440.91                               | 3.99      |
|                            | 439.23                               | 4.57      |
|                            | 438.05                               | 3.99      |
|                            | 430.61                               | 3.99      |
|                            | 426.99                               | 3.99      |
|                            | 422.06                               | 4.20      |
|                            | 420.25                               | 3.99      |
| Average                    | 428.95                               | 4.09      |
| T <sub>1</sub> (tta)       | 501.40                               | 3.84      |
|                            | 501.17                               | 3.99      |
|                            | 496.80                               | 3.88      |
|                            | 496.74                               | 3.77      |
| Average                    | 499.03                               | 3.87      |

Since the T<sub>1</sub> and T<sub>2</sub> states are primarily localized on different ligands (tta and bpm, respectively), it is possible to estimate the interligand energy transfer (ILET) distance based on the separation between their molecular orbital centroids (Figure S23). The shortest centroid-to-centroid distance between tta and bpm is 4.83 Å, as illustrated in Figure S23.

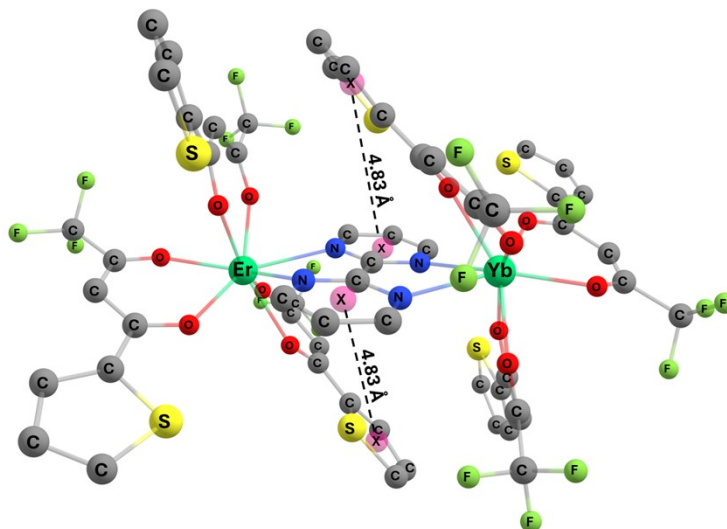

**Figure S23.** Optimized structure of the Er–Yb complex highlighting the shortest distance (4.83 Å) between the centroids of the tta and bpm ligands.

## Supporting Information

### 5.1. Energy transfer analysis

The sensitization process of [ $\{\text{Ln}(\text{tta})_3\}_2(\mu^2\text{-bpm})$ ] compounds involve complex and distinctive interactions. In addition to the conventional ligand-to-Ln energy transfer, interligand energy transfer also occurs. This is enabled by the near-resonance of the triplet states associated with tta and bpm, as predicted by TD-DFT calculations, and by the close energetic alignment of their centroids, which facilitates efficient tta–bpm energy transfer. Furthermore, under these conditions, a thermally activated back-transfer process can take place, whereby energy from the lower-energy triplet state  $T_1$  (tta) is transferred to the higher-energy triplet state  $T_2$  (bpm) as the temperature increases.

To evaluate the rates of this interligand energy transfer, we applied Förster's dipole–dipole (Eq. S3) and Dexter's exchange (Eq. S4) mechanisms, as detailed in the literature:<sup>12, 13</sup>

$$k_{d-d} = \frac{2\pi}{\hbar} \frac{S_D S_A}{g_D g_A R^6} \rho \quad \text{S3}$$

Here,  $S_D$  and  $S_A$  denote the dipole strengths of the donor and acceptor electronic transitions of the ligands ( $T_1$  and  $T_2$ , respectively), with degeneracies  $g_D$  and  $g_A$  (equal to 3 for triplet states). These dipole strengths can be estimated using the relation  $S = 3\hbar/(32\pi^3\delta^3\tau)$ , where  $\delta$  is the barycenter of the transition and  $\tau$  is the lifetime.

$$k_{ex} = \frac{2\pi e^4}{\hbar R^2} \langle \phi^* | \pi^* \rangle^2 \langle \phi | \pi \rangle^2 \rho \quad \text{S4}$$

With  $\langle \phi^* | \pi^* \rangle$  and  $\langle \phi | \pi \rangle$  representing the overlap integrals between the donor ( $|\pi\rangle$  and  $|\pi^*\rangle$ ) and acceptor ( $|\phi\rangle$  and  $|\phi^*\rangle$ ) states, with values typically ranging between 0.01 and 0.10, as reported by Faustino et al.<sup>14</sup> Both Eq. 3 and Eq. 4 exhibit a dependence on the donor–acceptor distance  $R$ , as illustrated in Figure S23.

In addition,  $\rho$  corresponds to the spectral overlap integral between the donor and acceptor bands, obtained from the phosphorescence spectra shown in Figures S14 and S15 for [ $\{\text{Gd}(\text{tta})_3\}_2(\mu^2\text{-bpm})$ ] excited at 366 nm. Two main contributions can be distinguished: the more intense peak at higher energy is attributed to the bpm moiety, while the weaker, lower-energy peak arises from the tta ligand. These assignments are consistent with the TD-DFT results (Figure S22 and Table S8).

The phosphorescence spectrum was converted from wavelength to wavenumber using a Jacobian transformation<sup>4</sup> and subsequently deconvoluted into Gaussian functions, revealing a clear spectral overlap between bpm and tta (Figure S24a).

## Supporting Information

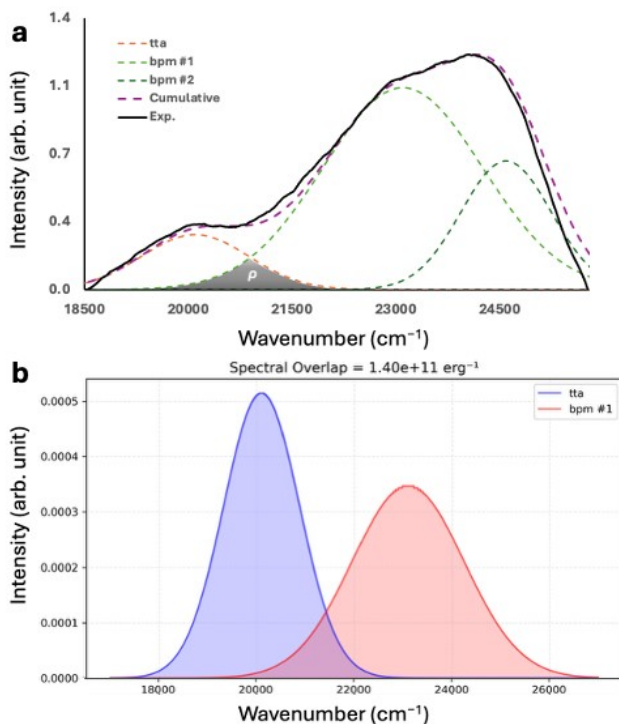

**Figure S24.** Spectral treatment of the phosphorescence band. (a) Jacobian transformation of the experimental spectrum (black line) and Gaussian function fittings (dashed lines) corresponding to tta (orange) and bpm (light green and dark green). The cumulative profile, obtained as the sum of these three Gaussian functions, closely reproduces the experimental phosphorescence band. The spectral overlap  $\rho$  is highlighted as the grey-filled area. b) Calculated spectral overlap ( $\rho = 1.40 \times 10^{11} \text{ erg}^{-1}$ ) between the tta and bpm triplet states.

The value of  $\rho$  can be obtained by integrating the product of the normalized Gaussian functions representing the donor and acceptor spectral bands:

$$\rho = \int_0^{\infty} G_D G_A dE \quad \text{S5}$$

Here,  $G_D$  and  $G_A$  represent the Gaussian functions for the donor and acceptor bands, respectively. Each Gaussian function is defined by:

$$G(E) = \frac{1}{\sigma\sqrt{\pi/2}} e^{-2\left(\frac{E-E_0}{\sigma}\right)^2} \quad \text{S6}$$

Where  $\sigma$  is the bandwidth and  $E_0$  is the energy of the maximum intensity of the curve. For the curves shown in Figure S24b,  $\sigma = 1550$  and  $2300 \text{ cm}^{-1}$ , and  $E_0 = 20100$  and  $23100$  for the tta (donor) and bpm (acceptor), respectively. Using these values, the spectral overlap integral  $\rho$  is  $2.77 \times 10^{-5} \text{ cm}$ . To convert to the common units of  $\text{erg}^{-1}$ , this value is divided by  $1.986 \times 10^{-16} \text{ erg}^{-1}/\text{cm}$ , resulting in a final value of  $\rho = 1.40 \times 10^{11} \text{ erg}^{-1}$ .

## Supporting Information

The backward energy transfer from tta  $\rightarrow$  bpm i is estimated by applying a Boltzmann factor to the forward energy transfer process (bpm  $\rightarrow$  tta), as described by Eqs. S3 and S4.

We now analyze the sensitization process from the ligands (tta and bpm) to the lanthanide ions ( $\text{Yb}^{3+}$  and  $\text{Er}^{3+}$ ), commonly referred to as the antenna effect. The energy transfer rates from the ligands to the  $\text{Ln}^{3+}$  ions can be determined following the procedures described in references.<sup>15, 16</sup>

Specifically, the rates associated with the dipole–dipole ( $W_{d-d}$ , Eq. S7), dipole-multipole ( $W_{d-m}$ , Eq. S8), and exchange ( $W_{ex}$ , Eq. S9) mechanisms are calculated as follows:

$$W_{d-d} = \frac{S_L(1-\sigma_1)^2 4\pi e^2}{(2J+1)g \hbar R_L^6} \sum_{\lambda} \Omega_{\lambda}^{FED} |\langle \psi'J' \| U^{(\lambda)} \| \psi J \rangle|^2 F \quad \text{S7}$$

$$W_{d-m} = \frac{S_L}{(2J+1)g} \frac{2\pi e^2}{\hbar} \sum_{\lambda} (\lambda+1) \frac{\langle r^{\lambda} \rangle^2}{(R_L^{\lambda+2})^2} \langle f \| C^{(\lambda)} \| f \rangle^2 \times (1-\sigma_{\lambda})^2 |\langle \psi'J' \| U^{(\lambda)} \| \psi J \rangle|^2 F \quad \text{S8}$$

$$W_{ex} = \frac{(1-\sigma_0)^2 8\pi e^2}{(2J+1)G \hbar R_L^4} |\langle \psi'J' \| S \| \psi J \rangle|^2 \sum_m \left| \left\langle \phi \left| \sum_j \mu_z(j) s_m(j) \right| \phi^* \right\rangle \right|^2 F \quad \text{S9}$$

where  $R_L$  denotes the distance between the lanthanide ion and the region of the ligand where the donor (or acceptor) electronic state is primarily localized. This region typically corresponds to aromatic rings and unsaturated bonds, as observed in phenylsulfonyl amidophosphate-based ligands<sup>17</sup> and ancillary ligands such as bipyridine.<sup>18</sup> The specific values of  $R_L$  for the dinuclear complex under study are reported in Table S8.

In Eq. S7,  $\Omega_{\lambda}^{FED}$  represents the intensity parameters that only consider the forced electric dipole mechanism (FED). In this study, these parameters were calculated using a charge factor of 1 within the Simple Overlap Model (SOM) for the ligand field.<sup>19, 20</sup>

The  $|\langle \psi'J' \| U^{(\lambda)} \| \psi J \rangle|^2$  are squared reduced matrix elements of the tensor operator of rank  $\lambda$  for the  $|\psi'J'\rangle \rightarrow |\psi J\rangle$  transition and their values are tabulated in<sup>21</sup> for  $\text{Er}^{3+}$  transitions and in<sup>22</sup> for the  $\text{Yb}^{3+} {}^2F_{7/2} \rightarrow {}^2F_{5/2}$  transition. The  $\langle 4f^{13}, {}^2F_{5/2} \| S \| 4f^{13}, {}^2F_{7/2} \rangle^2 = 3.429$  matrix element is non-zero for the case of  $\text{Yb}^{3+} {}^2F_{7/2} \rightarrow {}^2F_{5/2}$  transition<sup>23</sup> while almost all transitions involving the ground state of the  $\text{Er}^{3+}$  are zero ( $\Delta J \neq 0, \pm 1$ ).  $S_L$  is the dipole strength of the ligand transition (donor),  $\langle r^{\lambda} \rangle$  are the  $4f$  radial integrals,  $g$  is the ligand state degeneracy (1 for  $S_1$  and 3 for  $T_1$  and  $T_2$ ),  $\langle f \| C^{(\lambda)} \| f \rangle$  is the reduced matrix element of Racah's tensor operators, and  $(1-\sigma_{\lambda})$  are the shielding factors for electric multipolar interactions while  $(1-\sigma_0)$  is the shielding factor for the electric monopole.<sup>16, 24-26</sup>

## Supporting Information

In Eq. S9,  $S_m$  is the spin operator in the ligand,  $\mu_z$  is the dipole operator (its  $z$ -component) and it assumes values of  $\sim 10^{-36}$  (e.s.u.).<sup>16, 27</sup>

In the above equations,  $J$  represents the total angular momentum quantum number of the lanthanide ion, specifying its  $4f$  spectroscopic term. The term  $F$  appearing in Eqs. S7–S9 is the spectral overlap factor for the ligand-Ln<sup>3+</sup> transitions, which accounts for the energy mismatch condition between the donor and acceptor states. For ligand-to-Ln energy transfer, an analytical expression for  $F$  can be employed:

$$F = \frac{1}{\hbar\sigma_L} \sqrt{\frac{\ln\left(\frac{2}{\pi}\right)}{\pi}} e^{-\left(\frac{\Delta}{\hbar\sigma_L}\right)^2 \ln(2)} G(\Delta, T) \quad \text{S10}$$

where  $\Delta$  is the energy difference between donor state ( $D$ ) and lanthanide ion acceptor state ( $\Delta = E_D - E_{Ln}$ ) and  $\sigma_L$  is the bandwidth of the ligand state.<sup>16, 28</sup> The function  $G(\Delta, T)$  is the energy barrier factor given by  $\exp(\Delta/k_B T)$ , with  $k_B$  and  $T$  being the Boltzmann constant and temperature. This is activated only when the energy transfer pathway has negative values  $\Delta$ , otherwise,  $G(\Delta, T) = 1$ .

The energy transfer rates of a pathway  $W(p)$  are determined by summing all the mechanisms within that pathway ( $p$ ):

$$W(p) = W_{d-d}(p) + W_{d-m}(p) + W_{ex}(p) \quad \text{S11}$$

The energy transfer rates from  $S_1$  ( $W^S$ ),  $T_1$  ( $W^{T1}$ ), and  $T_2$  ( $W^{T2}$ ), and their corresponding backward rates ( $W_b^S$ ,  $W_b^T$ , and  $W_b^{T2}$ , respectively) are calculated by summing over all individual pathways:

$$W_a^C = \sum_p W(C, a, p) \quad \text{S12}$$

In this context, the superscript  $C$  stands for either S (representing the IET rate involving the  $S_1$  state) or T (involving  $T_1$  and  $T_2$  states) channels, while the subscript  $a$  represents the direction of the energy transfer flow. The absence of a letter in the subscript represents forward transfer (*i.e.*, ligand-to-lanthanide energy transfer), and when the letter  $b$  appears, it indicates backward transfer (*i.e.*, lanthanide-to-ligand energy transfer).

Tables S8-S11 present the calculated energy transfer pathways and their associated rates involving the tta and bpm ligands transferring energy to the Er<sup>3+</sup> and Yb<sup>3+</sup> ions. For energy transfer to the Er<sup>3+</sup> ion, the exchange mechanism is only allowed in pathways 1 and 13 due to the selection rule  $\Delta J = 0, \pm 1$ . However, because of non-resonant conditions (large  $|\Delta|$  values), the exchange mechanism can be neglected. The dipole–multipole mechanism dominates, particularly in pathway 6 of the forward energy transfer (*i.e.*, tta  $[T_1 \rightarrow S_0] \rightarrow \text{Er}^{3+} [{}^4I_{15/2} \rightarrow {}^2H_{11/2}]$  and bpm  $[T_1 \rightarrow S_0] \rightarrow \text{Er}^{3+} [{}^4I_{15/2} \rightarrow {}^2H_{11/2}]$ ), contributing approximately 99.9% and 99.3% of the total transfer rate, respectively.

## Supporting Information

In contrast, the back energy transfer involving  $\text{Er}^{3+}$  shows a different behaviour due to varying resonance conditions for tta (Table S9) and bpm (Table S10). The tta receives contributions from two pathways:  $\text{Er}^{3+} [{}^2\text{H}_{11/2} \rightarrow {}^4\text{I}_{15/2}] \rightarrow \text{tta} [\text{S}_0 \rightarrow \text{T}_1]$  and  $\text{Er}^{3+} [{}^4\text{F}_{7/2} \rightarrow {}^4\text{I}_{15/2}] \rightarrow \text{tta} [\text{S}_0 \rightarrow \text{T}_1]$  (pathway 21 and 22, Table S9). Conversely, bpm has only one significant contribution from a higher energy transition,  $\text{Er}^{3+} [{}^4\text{G}_{11/2} \rightarrow {}^4\text{I}_{15/2}] \rightarrow \text{bpm} [\text{S}_0 \rightarrow \text{T}_1]$  (pathway 26, Table S10), which is also the highest rate calculated for the  $\text{Er}^{3+}$  ion ( $1.8 \times 10^5 \text{ s}^{-1}$ ).

For the  $\text{Yb}^{3+}$  ion, the  ${}^2\text{F}_{7/2} \rightarrow {}^2\text{F}_{5/2}$  transition is strongly influenced by the exchange mechanism despite the large energy gap between the tta triplet state and the  $\text{Yb}^{3+}$  transition ( $\Delta = 9860 \text{ cm}^{-1}$ ). This influence is compensated by the large value of the reduced spin matrix elements  $\langle 4f^{13}, {}^2\text{F}_{5/2} \mid |S| \mid 4f^{13}, {}^2\text{F}_{7/2} \rangle^2 = 3.429$ , as discussed in detail in Ref.<sup>23</sup>

In summary, as the temperature increases, the tta ligand loses population to the bpm ligand through interligand energy transfer. Subsequently, bpm transfers energy to the  $\text{Er}^{3+}$  ion, particularly to the  ${}^2\text{H}_{11/2}$  level from where the  ${}^2\text{H}_{11/2} \rightarrow {}^4\text{I}_{15/2}$  band is originated. From this level, non-radiative decay through lower 4f states populate the  ${}^4\text{S}_{3/2}$  and  ${}^4\text{F}_{9/2}$  levels, giving rise to the corresponding  ${}^4\text{S}_{3/2} \rightarrow {}^4\text{I}_{15/2}$  and  ${}^4\text{F}_{9/2} \rightarrow {}^4\text{I}_{15/2}$  emission bands. Conversely, at low temperatures, the population of the  $\text{Yb}^{3+} {}^2\text{F}_{5/2}$  state is higher because the tta  $\rightarrow$  bpm energy transfer is not activated, making the direct tta  $\rightarrow$   $\text{Yb}^{3+}$  energy transfer more efficient

**Table S9.** Calculated forward tta-to- $\text{Er}^{3+}$  and backward  $\text{Er}^{3+}$ -to-tta energy transfer rates at 300 K.

| <i>p</i> | Donor                                                 | Acceptor                                              | Contr. (%) | $\Delta$ ( $\text{cm}^{-1}$ ) | $W$ ( $\text{s}^{-1}$ ) | $W_{d-d}$ ( $\text{s}^{-1}$ ) | $W_{d-m}$ ( $\text{s}^{-1}$ ) |
|----------|-------------------------------------------------------|-------------------------------------------------------|------------|-------------------------------|-------------------------|-------------------------------|-------------------------------|
| 1        | $\text{T}_1 \rightarrow \text{S}_0$                   | ${}^4\text{I}_{15/2} \rightarrow {}^4\text{I}_{13/2}$ | 0.0        | 13605                         | 1.0E-20                 | 1.0E-21                       | 8.9E-21                       |
| 2        | $\text{T}_1 \rightarrow \text{S}_0$                   | ${}^4\text{I}_{15/2} \rightarrow {}^4\text{I}_{11/2}$ | 0.0        | 9971                          | 7.0E-10                 | 1.5E-11                       | 6.9E-10                       |
| 3        | $\text{T}_1 \rightarrow \text{S}_0$                   | ${}^4\text{I}_{15/2} \rightarrow {}^4\text{I}_{9/2}$  | 0.0        | 7720                          | 5.2E-07                 | 3.7E-07                       | 1.5E-07                       |
| 4        | $\text{T}_1 \rightarrow \text{S}_0$                   | ${}^4\text{I}_{15/2} \rightarrow {}^4\text{F}_{9/2}$  | 0.0        | 4862                          | 1.1E-01                 | 9.3E-02                       | 1.7E-02                       |
| 5        | $\text{T}_1 \rightarrow \text{S}_0$                   | ${}^4\text{I}_{15/2} \rightarrow {}^4\text{S}_{3/2}$  | 0.0        | 1734                          | 1.0E+01                 | 1.0E+01                       | 5.7E-03                       |
| 6        | $\text{T}_1 \rightarrow \text{S}_0$                   | ${}^4\text{I}_{15/2} \rightarrow {}^2\text{H}_{11/2}$ | 99.9       | 980                           | 3.9E+04                 | 4.2E+01                       | 3.9E+04                       |
| 7        | $\text{T}_1 \rightarrow \text{S}_0$                   | ${}^4\text{I}_{15/2} \rightarrow {}^4\text{F}_{7/2}$  | 0.0        | -398                          | 1.2E+01                 | 1.1E+01                       | 5.8E-01                       |
| 8        | $\text{T}_1 \rightarrow \text{S}_0$                   | ${}^4\text{I}_{15/2} \rightarrow {}^4\text{F}_{5/2}$  | 0.0        | -2059                         | 3.6E-04                 | 3.6E-04                       | 2.0E-07                       |
| 9        | $\text{T}_1 \rightarrow \text{S}_0$                   | ${}^4\text{I}_{15/2} \rightarrow {}^4\text{F}_{3/2}$  | 0.0        | -2395                         | 2.7E-05                 | 2.7E-05                       | 1.5E-08                       |
| 10       | $\text{T}_1 \rightarrow \text{S}_0$                   | ${}^4\text{I}_{15/2} \rightarrow {}^4\text{H}_{9/2}$  | 0.0        | -4439                         | 4.9E-11                 | 4.8E-11                       | 1.3E-12                       |
| 11       | $\text{T}_1 \rightarrow \text{S}_0$                   | ${}^4\text{I}_{15/2} \rightarrow {}^4\text{G}_{11/2}$ | 0.0        | -6314                         | 4.7E-14                 | 5.1E-17                       | 4.7E-14                       |
| 12       | $\text{T}_1 \rightarrow \text{S}_0$                   | ${}^4\text{I}_{15/2} \rightarrow {}^4\text{G}_{9/2}$  | 0.0        | -7320                         | 4.0E-21                 | 3.3E-21                       | 7.1E-22                       |
| 13       | $\text{T}_1 \rightarrow \text{S}_0$                   | ${}^4\text{I}_{15/2} \rightarrow {}^2\text{K}_{15/2}$ | 0.0        | -7605                         | 1.2E-20                 | 7.2E-23                       | 1.2E-20                       |
| 14       | $\text{T}_1 \rightarrow \text{S}_0$                   | ${}^4\text{I}_{15/2} \rightarrow {}^4\text{G}_{7/2}$  | 0.0        | -7907                         | 7.2E-24                 | 6.9E-24                       | 2.8E-25                       |
| 15       | $\text{T}_1 \rightarrow \text{S}_0$                   | ${}^4\text{I}_{15/2} \rightarrow {}^2\text{P}_{1/2}$  | 0.0        | -13002                        | 0.0E+00                 | 0.0E+00                       | 0.0E+00                       |
|          |                                                       |                                                       |            | $W^{\text{T1}}$               | 3.9E+04                 |                               |                               |
| 16       | ${}^4\text{I}_{13/2} \rightarrow {}^4\text{I}_{15/2}$ | $\text{S}_0 \rightarrow \text{T}_1$                   | 0.0        | -13605                        | 5.3E-49                 | 5.6E-50                       | 4.7E-49                       |
| 17       | ${}^4\text{I}_{11/2} \rightarrow {}^4\text{I}_{15/2}$ | $\text{S}_0 \rightarrow \text{T}_1$                   | 0.0        | -9971                         | 1.6E-30                 | 3.5E-32                       | 1.6E-30                       |

## Supporting Information

|    |                                     |                       |      |            |         |         |         |
|----|-------------------------------------|-----------------------|------|------------|---------|---------|---------|
| 18 | $^4I_{9/2} \rightarrow ^4I_{15/2}$  | $S_0 \rightarrow T_1$ | 0.0  | -7720      | 7.2E-23 | 5.2E-23 | 2.1E-23 |
| 19 | $^4F_{9/2} \rightarrow ^4I_{15/2}$  | $S_0 \rightarrow T_1$ | 0.0  | -4862      | 1.4E-11 | 1.2E-11 | 2.1E-12 |
| 20 | $^4S_{3/2} \rightarrow ^4I_{15/2}$  | $S_0 \rightarrow T_1$ | 0.0  | -1734      | 1.2E-02 | 1.2E-02 | 6.9E-06 |
| 21 | $^2H_{11/2} \rightarrow ^4I_{15/2}$ | $S_0 \rightarrow T_1$ | 70.4 | -980       | 4.8E+02 | 5.2E-01 | 4.8E+02 |
| 22 | $^4F_{7/2} \rightarrow ^4I_{15/2}$  | $S_0 \rightarrow T_1$ | 24.4 | 398        | 1.7E+02 | 1.6E+02 | 8.4E+00 |
| 23 | $^4F_{5/2} \rightarrow ^4I_{15/2}$  | $S_0 \rightarrow T_1$ | 3.1  | 2059       | 2.1E+01 | 2.1E+01 | 1.2E-02 |
| 24 | $^4F_{3/2} \rightarrow ^4I_{15/2}$  | $S_0 \rightarrow T_1$ | 1.9  | 2395       | 1.3E+01 | 1.3E+01 | 7.3E-03 |
| 25 | $^4H_{9/2} \rightarrow ^4I_{15/2}$  | $S_0 \rightarrow T_1$ | 0.0  | 4439       | 1.4E-01 | 1.4E-01 | 3.9E-03 |
| 26 | $^4G_{11/2} \rightarrow ^4I_{15/2}$ | $S_0 \rightarrow T_1$ | 0.1  | 6314       | 9.0E-01 | 9.8E-04 | 9.0E-01 |
| 27 | $^4G_{9/2} \rightarrow ^4I_{15/2}$  | $S_0 \rightarrow T_1$ | 0.0  | 7320       | 1.2E-05 | 9.6E-06 | 2.1E-06 |
| 28 | $^2K_{15/2} \rightarrow ^4I_{15/2}$ | $S_0 \rightarrow T_1$ | 0.0  | 7605       | 8.6E-05 | 5.0E-07 | 8.6E-05 |
| 29 | $^4G_{7/2} \rightarrow ^4I_{15/2}$  | $S_0 \rightarrow T_1$ | 0.0  | 7907       | 4.6E-07 | 4.4E-07 | 1.8E-08 |
| 30 | $^2P_{1/2} \rightarrow ^4I_{15/2}$  | $S_0 \rightarrow T_1$ | 0.0  | 13002      | 0.0E+00 | 0.0E+00 | 0.0E+00 |
|    |                                     |                       |      | $W_b^{T1}$ | 6.8E+02 |         |         |

**Table S10.** Calculated forward bpm-to- $Er^{3+}$  and backward  $Er^{3+}$ -to-bpm energy transfer rates at 300 K.

| $p$ | Donor                               | Acceptor                            | Contr. (%) | $\Delta$ (cm <sup>-1</sup> ) | $W$ (s <sup>-1</sup> ) | $W_{d-d}$ (s <sup>-1</sup> ) | $W_{d-m}$ (s <sup>-1</sup> ) |
|-----|-------------------------------------|-------------------------------------|------------|------------------------------|------------------------|------------------------------|------------------------------|
| 1   | $T_2 \rightarrow S_0$               | $^4I_{15/2} \rightarrow ^4I_{13/2}$ | 0.0        | 16605                        | 2.6E-12                | 1.5E-13                      | 2.5E-12                      |
| 2   | $T_2 \rightarrow S_0$               | $^4I_{15/2} \rightarrow ^4I_{11/2}$ | 0.0        | 12971                        | 4.6E-06                | 5.3E-08                      | 4.6E-06                      |
| 3   | $T_2 \rightarrow S_0$               | $^4I_{15/2} \rightarrow ^4I_{9/2}$  | 0.0        | 10720                        | 5.4E-05                | 1.4E-05                      | 4.0E-05                      |
| 4   | $T_2 \rightarrow S_0$               | $^4I_{15/2} \rightarrow ^4F_{9/2}$  | 0.0        | 7862                         | 2.6E-01                | 1.2E-01                      | 1.5E-01                      |
| 5   | $T_2 \rightarrow S_0$               | $^4I_{15/2} \rightarrow ^4S_{3/2}$  | 0.0        | 4734                         | 5.9E+00                | 5.9E+00                      | 8.0E-02                      |
| 6   | $T_2 \rightarrow S_0$               | $^4I_{15/2} \rightarrow ^2H_{11/2}$ | 99.3       | 3980                         | 5.6E+04                | 3.2E+01                      | 5.6E+04                      |
| 7   | $T_2 \rightarrow S_0$               | $^4I_{15/2} \rightarrow ^4F_{7/2}$  | 0.4        | 2602                         | 2.0E+02                | 1.5E+02                      | 5.4E+01                      |
| 8   | $T_2 \rightarrow S_0$               | $^4I_{15/2} \rightarrow ^4F_{5/2}$  | 0.2        | 941                          | 1.0E+02                | 9.8E+01                      | 1.3E+00                      |
| 9   | $T_2 \rightarrow S_0$               | $^4I_{15/2} \rightarrow ^4F_{3/2}$  | 0.1        | 605                          | 6.0E+01                | 5.9E+01                      | 8.1E-01                      |
| 10  | $T_2 \rightarrow S_0$               | $^4I_{15/2} \rightarrow ^4H_{9/2}$  | 0.0        | -1439                        | 1.0E-01                | 8.7E-02                      | 1.7E-02                      |
| 11  | $T_2 \rightarrow S_0$               | $^4I_{15/2} \rightarrow ^4G_{11/2}$ | 0.0        | -3314                        | 1.7E-02                | 9.6E-06                      | 1.7E-02                      |
| 12  | $T_2 \rightarrow S_0$               | $^4I_{15/2} \rightarrow ^4G_{9/2}$  | 0.0        | -4320                        | 3.0E-08                | 1.2E-08                      | 1.8E-08                      |
| 13  | $T_2 \rightarrow S_0$               | $^4I_{15/2} \rightarrow ^2K_{15/2}$ | 0.0        | -4605                        | 2.1E-07                | 6.4E-10                      | 2.1E-07                      |
| 14  | $T_2 \rightarrow S_0$               | $^4I_{15/2} \rightarrow ^4G_{7/2}$  | 0.0        | -4907                        | 2.1E-10                | 1.6E-10                      | 4.6E-11                      |
| 15  | $T_2 \rightarrow S_0$               | $^4I_{15/2} \rightarrow ^2P_{1/2}$  | 0.0        | -10002                       | 0.0E+00                | 0.0E+00                      | 0.0E+00                      |
|     |                                     |                                     |            | $W^{T2}$                     | 5.6E+04                |                              |                              |
| 16  | $^4I_{13/2} \rightarrow ^4I_{15/2}$ | $S_0 \rightarrow T_2$               | 0.0        | -16605                       | 7.9E-47                | 4.6E-48                      | 7.4E-47                      |
| 17  | $^4I_{11/2} \rightarrow ^4I_{15/2}$ | $S_0 \rightarrow T_2$               | 0.0        | -12971                       | 6.0E-33                | 7.0E-35                      | 6.0E-33                      |
| 18  | $^4I_{9/2} \rightarrow ^4I_{15/2}$  | $S_0 \rightarrow T_2$               | 0.0        | -10720                       | 4.2E-27                | 1.1E-27                      | 3.1E-27                      |
| 19  | $^4F_{9/2} \rightarrow ^4I_{15/2}$  | $S_0 \rightarrow T_2$               | 0.0        | -7862                        | 1.9E-17                | 8.3E-18                      | 1.0E-17                      |
| 20  | $^4S_{3/2} \rightarrow ^4I_{15/2}$  | $S_0 \rightarrow T_2$               | 0.0        | -4734                        | 4.1E-09                | 4.0E-09                      | 5.5E-11                      |
| 21  | $^2H_{11/2} \rightarrow ^4I_{15/2}$ | $S_0 \rightarrow T_2$               | 0.0        | -3980                        | 3.9E-04                | 2.2E-07                      | 3.9E-04                      |
| 22  | $^4F_{7/2} \rightarrow ^4I_{15/2}$  | $S_0 \rightarrow T_2$               | 0.0        | -2602                        | 1.6E-03                | 1.2E-03                      | 4.4E-04                      |
| 23  | $^4F_{5/2} \rightarrow ^4I_{15/2}$  | $S_0 \rightarrow T_2$               | 0.0        | -941                         | 3.3E+00                | 3.2E+00                      | 4.4E-02                      |

## Supporting Information

|    |                                     |                       |      |            |         |         |         |
|----|-------------------------------------|-----------------------|------|------------|---------|---------|---------|
| 24 | $^4F_{3/2} \rightarrow ^4I_{15/2}$  | $S_0 \rightarrow T_2$ | 0.0  | -605       | 1.7E+01 | 1.6E+01 | 2.2E-01 |
| 25 | $^4H_{9/2} \rightarrow ^4I_{15/2}$  | $S_0 \rightarrow T_2$ | 0.1  | 1439       | 1.7E+02 | 1.4E+02 | 2.9E+01 |
| 26 | $^4G_{11/2} \rightarrow ^4I_{15/2}$ | $S_0 \rightarrow T_2$ | 99.4 | 3314       | 1.8E+05 | 1.1E+02 | 1.8E+05 |
| 27 | $^4G_{9/2} \rightarrow ^4I_{15/2}$  | $S_0 \rightarrow T_2$ | 0.0  | 4320       | 4.9E+01 | 2.0E+01 | 2.9E+01 |
| 28 | $^2K_{15/2} \rightarrow ^4I_{15/2}$ | $S_0 \rightarrow T_2$ | 0.4  | 4605       | 8.2E+02 | 2.5E+00 | 8.2E+02 |
| 29 | $^4G_{7/2} \rightarrow ^4I_{15/2}$  | $S_0 \rightarrow T_2$ | 0.0  | 4907       | 7.5E+00 | 5.8E+00 | 1.7E+00 |
| 30 | $^2P_{1/2} \rightarrow ^4I_{15/2}$  | $S_0 \rightarrow T_2$ | 0.0  | 10002      | 0.0E+00 | 0.0E+00 | 0.0E+00 |
|    |                                     |                       |      | $W_b^{T2}$ | 1.8E+05 |         |         |

**Table S11.** Calculated forward tta-to-Yb<sup>3+</sup> and backward Yb<sup>3+</sup>-to-tta energy transfer rates at 300 K.

| $p$ | Donor                             | Acceptor                          | $\Delta$ (cm <sup>-1</sup> ) | $W$ (s <sup>-1</sup> ) | $W_{d-d}$ (s <sup>-1</sup> ) | $W_{d-m}$ (s <sup>-1</sup> ) | $W_{ex}$ |
|-----|-----------------------------------|-----------------------------------|------------------------------|------------------------|------------------------------|------------------------------|----------|
| 1   | $T_1 \rightarrow S_0$             | $^2F_{7/2} \rightarrow ^2F_{5/2}$ | 9860                         | 2.2E+06                | 4.2E-02                      | 8.0E+00                      | 2.2E+06  |
| 2   | $^2F_{5/2} \rightarrow ^2F_{7/2}$ | $S_0 \rightarrow T_1$             | -9860                        | 9.0E-15                | 1.7E-22                      | 3.2E-20                      | 9.0E-15  |

**Table S12.** Calculated forward bpm-to-Yb<sup>3+</sup> and backward Yb<sup>3+</sup>-to-bpm energy transfer rates at 300 K.

| $p$ | Donor                             | Acceptor                          | $\Delta$ (cm <sup>-1</sup> ) | $W$ (s <sup>-1</sup> ) | $W_{d-d}$ (s <sup>-1</sup> ) | $W_{d-m}$ (s <sup>-1</sup> ) | $W_{ex}$ |
|-----|-----------------------------------|-----------------------------------|------------------------------|------------------------|------------------------------|------------------------------|----------|
| 1   | $T_2 \rightarrow S_0$             | $^2F_{7/2} \rightarrow ^2F_{5/2}$ | 12860                        | 1.6E+01                | 4.1E-07                      | 7.0E-05                      | 1.6E+01  |
| 2   | $^2F_{5/2} \rightarrow ^2F_{7/2}$ | $S_0 \rightarrow T_2$             | -12860                       | 3.8E-26                | 9.5E-34                      | 1.6E-31                      | 3.8E-26  |

The energy transfer rates from the ligand states to the Ln<sup>3+</sup> ions as a function of temperature are illustrated in Figures S25 and S26.

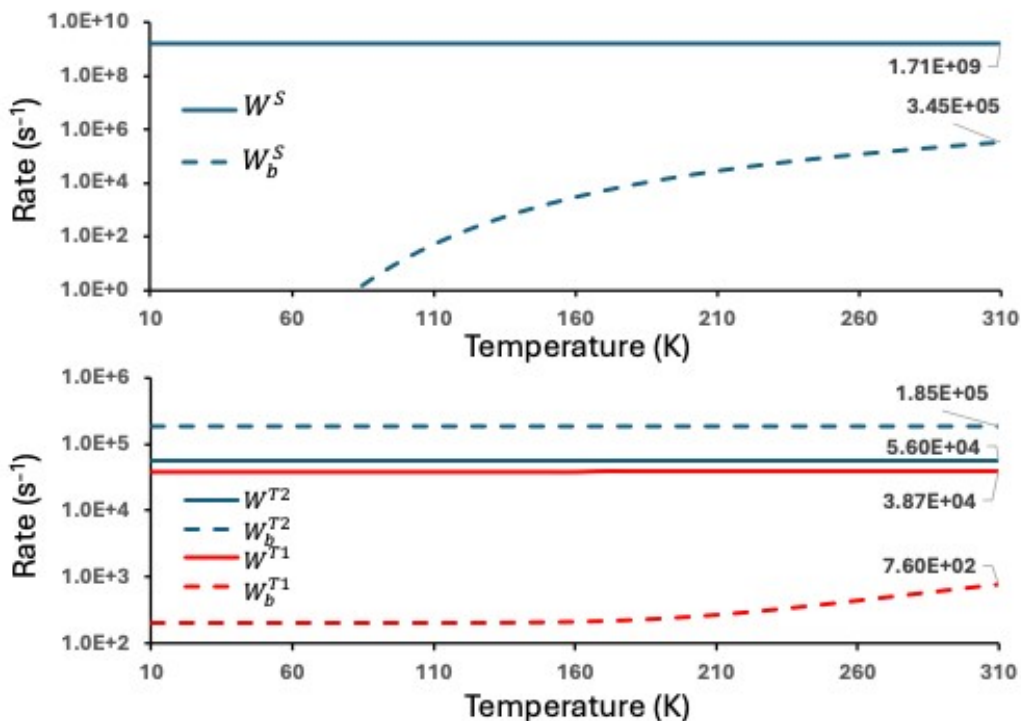

## Supporting Information

**Figure S25.** Energy transfer rates as a function of temperature involving the  $S_1$ ,  $T_1$ , and  $T_2$  states to the  $\text{Er}^{3+}$  ion.

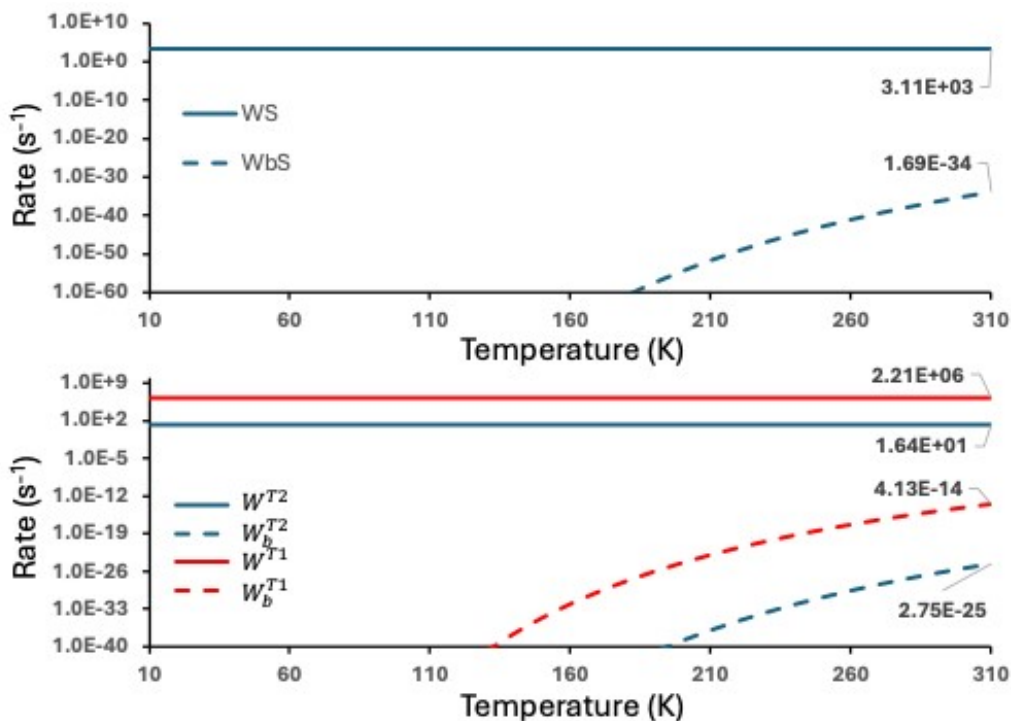

**Figure S26.** Energy transfer rates as a function of temperature involving the  $S_1$ ,  $T_1$ , and  $T_2$  states to the  $\text{Yb}^{3+}$  ion.

The energy transfer rates between the  $\text{Yb}^{3+}$  and  $\text{Er}^{3+}$  centers in **1** were calculated considering the dipole-dipole, dipole-quadrupole (quadrupole-dipole), quadrupole-quadrupole, and exchange mechanisms as follows:<sup>29</sup>

$$W_{d-d} = \frac{4\pi S_d^D S_d^A}{3\hbar R^6} F \quad \text{S13}$$

$$W_{d-q} = \frac{\pi(S_d^D S_q^A + S_q^D S_d^A)}{\hbar R^8} F \quad \text{S14}$$

$$W_{q-q} = \frac{28\pi S_q^D S_q^A}{5\hbar R^{10}} F \quad \text{S15}$$

$$W_{ex} = \frac{2\pi}{\hbar} \left[ \left( \frac{e^2}{R} \right) \rho_{f-f} \right]^2 F \quad \text{S16}$$

## Supporting Information

where  $S_d$  and  $S_q$  are the electric dipole and quadrupole strengths for the transitions involved – the superscript indicates if it is from the donor (D, Yb<sup>3+</sup>) or acceptor (A, Er<sup>3+</sup>).  $R$  is the distance between the Yb–Er centers in **1**, which is, from the crystallographic structure  $R = 6.77 \text{ \AA}$ .  $F$  is the spectral overlap between the donor and acceptor transitions, which contains the energy mismatch conditions ( $\Delta$ ) and  $\rho_{f-f}$  is the Er<sup>3+</sup> 4f<sup>11</sup> and Yb<sup>3+</sup> 4f<sup>13</sup> overlap integral.<sup>25</sup>

**Table S13.** Calculated Yb–Er energy transfer rates.  $W$  (s<sup>-1</sup>) is the sum of all mechanisms with the application of the Boltzmann factor if  $\Delta$  is negative. The donor transition is the Yb<sup>3+</sup> <sup>2</sup>F<sub>5/2</sub> → <sup>2</sup>F<sub>7/2</sub>.

| $p$ | Acceptor                                                        | Contr. (%) | $\Delta$ (cm <sup>-1</sup> ) | $W$ (s <sup>-1</sup> ) | $W_{d-d}$ (s <sup>-1</sup> ) | $W_{d-q}$ | $W_{q-q}$ (s <sup>-1</sup> ) | $W_{ex}$ (s <sup>-1</sup> ) |
|-----|-----------------------------------------------------------------|------------|------------------------------|------------------------|------------------------------|-----------|------------------------------|-----------------------------|
| 1   | <sup>4</sup> I <sub>15/2</sub> → <sup>4</sup> I <sub>13/2</sub> | 0.0        | 3755                         | 9.7E-10                | 2.5E-11                      | 1.6E-10   | 7.8E-10                      | 1.0E-21                     |
| 2   | <sup>4</sup> I <sub>15/2</sub> → <sup>4</sup> I <sub>11/2</sub> | 89.0       | 121                          | 6.7E+05                | 4.4E+02                      | 1.7E+04   | 6.5E+05                      | 1.8E-08                     |
| 3   | <sup>4</sup> I <sub>15/2</sub> → <sup>4</sup> I <sub>9/2</sub>  | 0.0        | -2130                        | 6.6E-07                | 2.6E-03                      | 1.5E-02   | 0.0E+00                      | 1.0E-12                     |
| 4   | <sup>4</sup> I <sub>15/2</sub> → <sup>4</sup> F <sub>9/2</sub>  | 0.0        | -4988                        | 3.3E-31                | 1.2E-21                      | 6.9E-21   | 0.0E+00                      | 7.3E-32                     |
| 5   | <sup>4</sup> I <sub>15/2</sub> → <sup>4</sup> S <sub>3/2</sub>  | 0.0        | -8116                        | ~0                     | 7.0E-61                      | 4.2E-60   | 0.0E+00                      | 2.0E-70                     |
| 6   | <sup>4</sup> I <sub>15/2</sub> → <sup>2</sup> H <sub>11/2</sub> | 0.0        | -8870                        | ~0                     | 3.4E-72                      | 1.4E-70   | 5.1E-69                      | 1.8E-82                     |
| 7   | <sup>4</sup> I <sub>15/2</sub> → <sup>4</sup> F <sub>7/2</sub>  | 0.0        | -10248                       | ~0                     | 3.6E-97                      | 2.1E-96   | 0.0E+00                      | 3.0E-107                    |
| 8   | <sup>4</sup> I <sub>15/2</sub> → <sup>4</sup> F <sub>5/2</sub>  | 0.0        | -11909                       | ~0                     | 2.5E-132                     | 1.5E-131  | 0.0E+00                      | 7.1E-142                    |
| 9   | <sup>4</sup> I <sub>15/2</sub> → <sup>4</sup> F <sub>3/2</sub>  | 0.0        | -12245                       | ~0                     | 3.2E-140                     | 1.9E-139  | 0.0E+00                      | 1.6E-149                    |
| 10  | <sup>4</sup> I <sub>15/2</sub> → <sup>2</sup> H <sub>9/2</sub>  | 0.0        | -14289                       | ~0                     | 5.9E-191                     | 3.5E-190  | 0.0E+00                      | 1.6E-200                    |
| 11  | <sup>4</sup> I <sub>15/2</sub> → <sup>4</sup> G <sub>11/2</sub> | 0.0        | -16164                       | ~0                     | 7.4E-244                     | 2.9E-242  | 1.1E-240                     | 3.0E-254                    |
| 12  | <sup>4</sup> I <sub>15/2</sub> → <sup>4</sup> G <sub>9/2</sub>  | 0.0        | -17170                       | 0                      | 5.0E-276                     | 3.0E-275  | 0.0E+00                      | 8.6E-286                    |
| 13  | <sup>4</sup> I <sub>13/2</sub> → <sup>4</sup> I <sub>11/2</sub> | 0.0        | 6616                         | 2.1E-37                | 2.9E-39                      | 2.1E-38   | 1.9E-37                      | 1.2E-49                     |
| 14  | <sup>4</sup> I <sub>13/2</sub> → <sup>4</sup> I <sub>9/2</sub>  | 0.0        | 4365                         | 2.3E-15                | 2.8E-16                      | 1.7E-15   | 3.0E-16                      | 2.2E-26                     |
| 15  | <sup>4</sup> I <sub>13/2</sub> → <sup>4</sup> F <sub>9/2</sub>  | 0.0        | 1507                         | 7.2E+01                | 6.0E-01                      | 5.1E+00   | 6.7E+01                      | 1.4E-10                     |
| 16  | <sup>4</sup> I <sub>13/2</sub> → <sup>4</sup> S <sub>3/2</sub>  | 0.0        | -1621                        | 1.1E-03                | 3.8E-01                      | 2.3E+00   | 0.0E+00                      | 6.3E-11                     |
| 17  | <sup>4</sup> I <sub>13/2</sub> → <sup>2</sup> H <sub>11/2</sub> | 0.0        | -2375                        | 1.1E-06                | 2.2E-04                      | 3.5E-03   | 9.7E-02                      | 9.2E-14                     |
| 18  | <sup>4</sup> I <sub>13/2</sub> → <sup>4</sup> F <sub>7/2</sub>  | 0.0        | -3753                        | 6.7E-19                | 6.3E-12                      | 3.8E-11   | 0.0E+00                      | 1.0E-21                     |
| 19  | <sup>4</sup> I <sub>13/2</sub> → <sup>4</sup> F <sub>5/2</sub>  | 0.0        | -5414                        | 1.7E-36                | 4.6E-26                      | 2.7E-25   | 0.0E+00                      | 4.9E-36                     |
| 20  | <sup>4</sup> I <sub>13/2</sub> → <sup>4</sup> F <sub>3/2</sub>  | 0.0        | -5750                        | ~0                     | 9.1E-31                      | 5.4E-30   | 0.0E+00                      | 1.5E-39                     |
| 21  | <sup>4</sup> I <sub>13/2</sub> → <sup>2</sup> H <sub>9/2</sub>  | 0.0        | -7794                        | ~0                     | 1.2E-55                      | 1.5E-54   | 3.5E-53                      | 1.3E-65                     |
| 22  | <sup>4</sup> I <sub>13/2</sub> → <sup>4</sup> G <sub>11/2</sub> | 0.0        | -9669                        | ~0                     | 2.3E-86                      | 3.5E-85   | 9.5E-84                      | 2.1E-96                     |
| 23  | <sup>4</sup> I <sub>13/2</sub> → <sup>4</sup> G <sub>9/2</sub>  | 0.0        | -10675                       | ~0                     | 3.1E-105                     | 1.5E-103  | 5.9E-102                     | 1.2E-115                    |
| 24  | <sup>4</sup> I <sub>11/2</sub> → <sup>4</sup> I <sub>9/2</sub>  | 0.0        | 7999                         | ~0                     | 5.5E-59                      | 3.6E-58   | 1.3E-57                      | 1.2E-68                     |
| 25  | <sup>4</sup> I <sub>11/2</sub> → <sup>4</sup> F <sub>9/2</sub>  | 0.0        | 5141                         | 1.0E-20                | 7.1E-23                      | 6.4E-22   | 9.6E-21                      | 2.5E-33                     |
| 26  | <sup>4</sup> I <sub>11/2</sub> → <sup>4</sup> S <sub>3/2</sub>  | 0.0        | 2013                         | 3.4E-02                | 4.9E-03                      | 2.9E-02   | 0.0E+00                      | 2.9E-12                     |
| 27  | <sup>4</sup> I <sub>11/2</sub> → <sup>2</sup> H <sub>11/2</sub> | 0.2        | 1259                         | 1.2E+03                | 2.6E+00                      | 4.1E+01   | 1.1E+03                      | 6.0E-10                     |
| 28  | <sup>4</sup> I <sub>11/2</sub> → <sup>4</sup> F <sub>7/2</sub>  | 0.3        | -119                         | 2.4E+03                | 1.6E+02                      | 1.0E+03   | 3.0E+03                      | 1.8E-08                     |
| 29  | <sup>4</sup> I <sub>11/2</sub> → <sup>4</sup> F <sub>5/2</sub>  | 0.0        | -1780                        | 5.6E-05                | 4.1E-02                      | 2.4E-01   | 0.0E+00                      | 1.9E-11                     |
| 30  | <sup>4</sup> I <sub>11/2</sub> → <sup>4</sup> F <sub>3/2</sub>  | 0.0        | -2116                        | 3.7E-06                | 1.4E-02                      | 8.1E-02   | 0.0E+00                      | 1.1E-12                     |
| 31  | <sup>4</sup> I <sub>11/2</sub> → <sup>2</sup> H <sub>9/2</sub>  | 0.0        | -4160                        | 4.4E-21                | 4.4E-15                      | 7.0E-14   | 2.0E-12                      | 9.7E-25                     |
| 32  | <sup>4</sup> I <sub>11/2</sub> → <sup>4</sup> G <sub>11/2</sub> | 0.0        | -6035                        | ~0                     | 1.3E-33                      | 8.0E-33   | 1.1E-32                      | 1.0E-42                     |

## Supporting Information

|    |                                     |      |       |         |         |         |         |          |
|----|-------------------------------------|------|-------|---------|---------|---------|---------|----------|
| 33 | $^4I_{11/2} \rightarrow ^4G_{9/2}$  | 0.0  | -7041 | ~0      | 2.4E-45 | 6.2E-44 | 2.1E-42 | 4.3E-55  |
| 34 | $^4I_{9/2} \rightarrow ^4F_{9/2}$   | 0.0  | 7392  | ~0      | 2.7E-50 | 1.4E-48 | 5.7E-47 | 7.3E-60  |
| 35 | $^4I_{9/2} \rightarrow ^4S_{3/2}$   | 0.0  | 4264  | 8.4E-15 | 1.2E-15 | 7.2E-15 | 0.0E+00 | 1.5E-25  |
| 36 | $^4I_{9/2} \rightarrow ^2H_{11/2}$  | 0.0  | 3510  | 6.1E-07 | 6.5E-10 | 1.7E-08 | 5.9E-07 | 4.8E-20  |
| 37 | $^4I_{9/2} \rightarrow ^4F_{7/2}$   | 0.0  | 2132  | 1.1E+00 | 1.3E-02 | 1.0E-01 | 9.6E-01 | 9.8E-13  |
| 38 | $^4I_{9/2} \rightarrow ^4F_{5/2}$   | 10.1 | 471   | 7.5E+04 | 7.9E+01 | 2.1E+03 | 7.3E+04 | 1.1E-08  |
| 39 | $^4I_{9/2} \rightarrow ^4F_{3/2}$   | 0.1  | 135   | 8.9E+02 | 1.3E+02 | 7.6E+02 | 0.0E+00 | 1.8E-08  |
| 40 | $^4I_{9/2} \rightarrow ^2H_{9/2}$   | 0.0  | -1909 | 6.6E-04 | 4.1E-03 | 1.6E-01 | 6.0E+00 | 6.9E-12  |
| 41 | $^4I_{9/2} \rightarrow ^4G_{11/2}$  | 0.0  | -3784 | 3.4E-17 | 1.5E-12 | 6.6E-11 | 2.5E-09 | 6.3E-22  |
| 42 | $^4I_{9/2} \rightarrow ^4G_{9/2}$   | 0.0  | -4790 | 1.4E-28 | 1.8E-21 | 3.9E-20 | 1.3E-18 | 4.8E-30  |
| 43 | $^4F_{9/2} \rightarrow ^4S_{3/2}$   | 0.0  | 7122  | ~0      | 2.0E-47 | 1.2E-46 | 0.0E+00 | 3.6E-56  |
| 44 | $^4F_{9/2} \rightarrow ^2H_{11/2}$  | 0.0  | 6368  | 3.2E-33 | 1.3E-36 | 7.9E-35 | 3.2E-33 | 1.3E-46  |
| 45 | $^4F_{9/2} \rightarrow ^4F_{7/2}$   | 0.0  | 4990  | 5.5E-20 | 1.0E-22 | 1.8E-21 | 5.3E-20 | 7.0E-32  |
| 46 | $^4F_{9/2} \rightarrow ^4F_{5/2}$   | 0.0  | 3329  | 9.3E-08 | 1.0E-08 | 6.1E-08 | 2.2E-08 | 7.0E-19  |
| 47 | $^4F_{9/2} \rightarrow ^4F_{3/2}$   | 0.0  | 2993  | 7.7E-07 | 1.1E-07 | 6.6E-07 | 0.0E+00 | 6.9E-17  |
| 48 | $^4F_{9/2} \rightarrow ^2H_{9/2}$   | 0.2  | 949   | 1.3E+03 | 5.3E+00 | 6.0E+01 | 1.3E+03 | 2.6E-09  |
| 49 | $^4F_{9/2} \rightarrow ^4G_{11/2}$  | 0.1  | -926  | 9.5E+02 | 3.4E+01 | 2.0E+03 | 7.8E+04 | 2.9E-09  |
| 50 | $^4F_{9/2} \rightarrow ^4G_{9/2}$   | 0.0  | -1932 | 1.4E-04 | 2.1E-03 | 4.6E-02 | 1.5E+00 | 5.7E-12  |
| 51 | $^4S_{3/2} \rightarrow ^2H_{11/2}$  | 0.0  | 9496  | ~0      | 3.6E-83 | 2.1E-82 | 0.0E+00 | 2.8E-93  |
| 52 | $^4S_{3/2} \rightarrow ^4F_{7/2}$   | 0.0  | 8118  | ~0      | 6.4E-62 | 3.8E-61 | 0.0E+00 | 1.9E-70  |
| 53 | $^4S_{3/2} \rightarrow ^4F_{5/2}$   | 0.0  | 6457  | 1.4E-35 | 7.9E-39 | 3.5E-37 | 1.4E-35 | 1.1E-47  |
| 54 | $^4S_{3/2} \rightarrow ^4F_{3/2}$   | 0.0  | 6121  | 4.5E-31 | 1.7E-34 | 1.1E-32 | 4.4E-31 | 1.1E-43  |
| 55 | $^4S_{3/2} \rightarrow ^2H_{9/2}$   | 0.0  | 4077  | 9.3E-15 | 1.3E-15 | 7.9E-15 | 0.0E+00 | 4.3E-24  |
| 56 | $^4S_{3/2} \rightarrow ^4G_{11/2}$  | 0.0  | 2202  | 2.9E-02 | 4.2E-03 | 2.5E-02 | 0.0E+00 | 5.1E-13  |
| 57 | $^4S_{3/2} \rightarrow ^4G_{9/2}$   | 0.0  | 1196  | 6.4E+01 | 9.2E+00 | 5.5E+01 | 0.0E+00 | 8.4E-10  |
| 58 | $^2H_{11/2} \rightarrow ^4F_{7/2}$  | 0.0  | 8872  | ~0      | 1.9E-72 | 3.6E-71 | 1.1E-69 | 1.7E-82  |
| 59 | $^2H_{11/2} \rightarrow ^4F_{5/2}$  | 0.0  | 7211  | ~0      | 1.1E-47 | 6.8E-47 | 0.0E+00 | 2.2E-57  |
| 60 | $^2H_{11/2} \rightarrow ^4F_{3/2}$  | 0.0  | 6875  | ~0      | 3.8E-45 | 2.3E-44 | 0.0E+00 | 6.4E-53  |
| 61 | $^2H_{11/2} \rightarrow ^2H_{9/2}$  | 0.0  | 4831  | 3.2E-18 | 1.1E-20 | 1.3E-19 | 3.1E-18 | 2.1E-30  |
| 62 | $^2H_{11/2} \rightarrow ^4G_{11/2}$ | 0.0  | 2956  | 5.7E-06 | 4.7E-07 | 2.8E-06 | 2.4E-06 | 1.1E-16  |
| 63 | $^2H_{11/2} \rightarrow ^4G_{9/2}$  | 0.0  | 1950  | 6.6E+00 | 5.4E-02 | 4.6E-01 | 6.1E+00 | 4.9E-12  |
| 64 | $^4F_{7/2} \rightarrow ^4F_{5/2}$   | 0.0  | 8589  | ~0      | 5.2E-68 | 1.3E-66 | 4.5E-65 | 7.4E-78  |
| 65 | $^4F_{7/2} \rightarrow ^4F_{3/2}$   | 0.0  | 8253  | ~0      | 2.9E-63 | 2.5E-62 | 3.3E-61 | 1.6E-72  |
| 66 | $^4F_{7/2} \rightarrow ^2H_{9/2}$   | 0.0  | 6209  | 7.3E-32 | 5.2E-35 | 1.9E-33 | 7.1E-32 | 1.0E-44  |
| 67 | $^4F_{7/2} \rightarrow ^4G_{11/2}$  | 0.0  | 4334  | 2.8E-13 | 2.8E-16 | 7.8E-15 | 2.7E-13 | 4.0E-26  |
| 68 | $^4F_{7/2} \rightarrow ^4G_{9/2}$   | 0.0  | 3328  | 3.6E-05 | 1.7E-08 | 8.8E-07 | 3.5E-05 | 7.1E-19  |
| 69 | $^4F_{5/2} \rightarrow ^4F_{3/2}$   | 0.0  | 9914  |         | 2.6E-91 | 1.1E-89 | 4.1E-88 | 6.4E-101 |
| 70 | $^4F_{5/2} \rightarrow ^2H_{9/2}$   | 0.0  | 7870  | ~0      | 1.5E-57 | 3.1E-56 | 9.8E-55 | 1.0E-66  |
| 71 | $^4F_{5/2} \rightarrow ^4G_{11/2}$  | 0.0  | 5995  | 9.8E-32 | 1.4E-32 | 8.4E-32 | 0.0E+00 | 2.9E-42  |
| 72 | $^4F_{5/2} \rightarrow ^4G_{9/2}$   | 0.0  | 4989  | 1.3E-18 | 7.5E-22 | 3.2E-20 | 1.2E-18 | 7.1E-32  |
| 73 | $^4F_{3/2} \rightarrow ^2H_{9/2}$   | 0.0  | 8206  | ~0      | 1.3E-62 | 7.6E-62 | 0.0E+00 | 8.3E-72  |
| 74 | $^4F_{3/2} \rightarrow ^4G_{11/2}$  | 0.0  | 6331  | 1.8E-35 | 2.6E-36 | 1.5E-35 | 0.0E+00 | 3.7E-46  |
| 75 | $^4F_{3/2} \rightarrow ^4G_{9/2}$   | 0.0  | 5325  | 4.8E-24 | 6.9E-25 | 4.1E-24 | 0.0E+00 | 3.9E-35  |

## Supporting Information

|    |                                    |     |      |          |         |         |         |         |
|----|------------------------------------|-----|------|----------|---------|---------|---------|---------|
| 76 | $^2H_{9/2} \rightarrow ^4G_{11/2}$ | 0.0 | 8375 | $\sim 0$ | 2.6E-64 | 9.7E-63 | 3.6E-61 | 1.9E-74 |
| 77 | $^2H_{9/2} \rightarrow ^4G_{9/2}$  | 0.0 | 7369 | $\sim 0$ | 2.2E-50 | 6.8E-49 | 2.4E-47 | 1.5E-59 |
| 78 | $^4G_{11/2} \rightarrow ^4G_{9/2}$ | 0.0 | 9244 | $\sim 0$ | 5.8E-79 | 3.4E-78 | 0.0E+00 | 7.6E-89 |

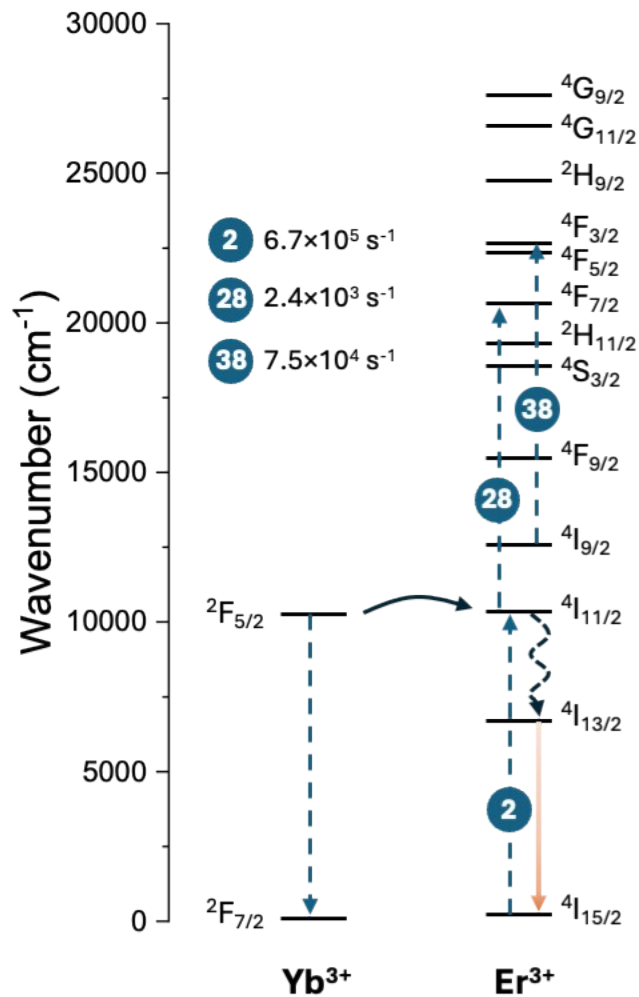

**Figure S27.** Partial energy level diagram showing only the three main Yb-Er interactions for the distance of  $6.77 \text{ \AA}$  at 300 K. The labels correspond to the pathway number in Table S13.

## Supporting Information

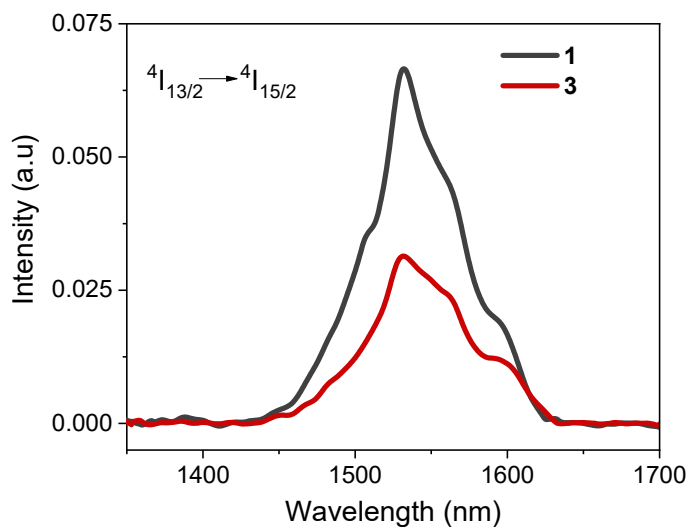

**Figure S28.** NIR emission spectrum for **1** and **3** at room temperature under 980 nm laser excitation.

### 5.2 Multireference *ab initio* calculations

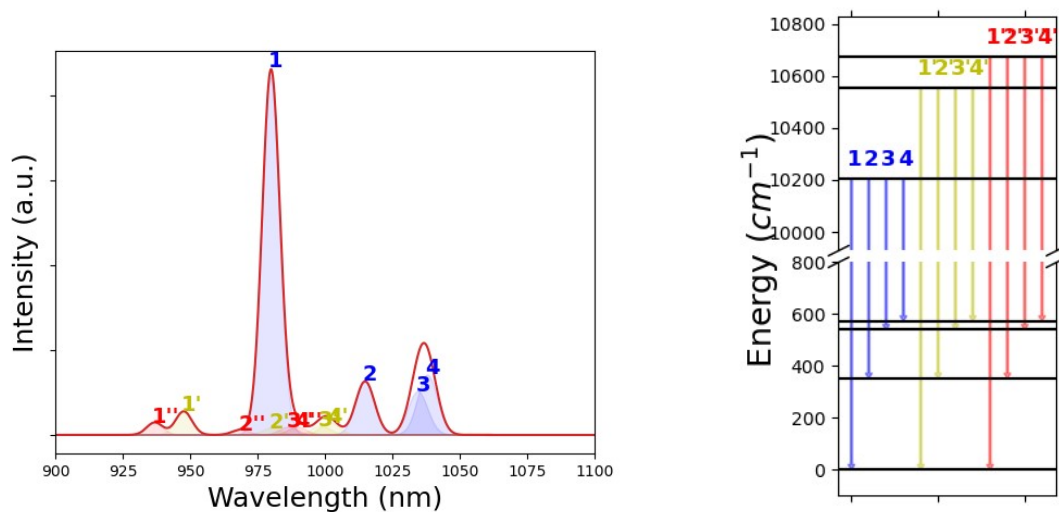

**Figure S29.** (Left) Decomposition of the  $2F_{5/2} \rightarrow 2F_{7/2}$  band in the contributions of each pair of Kramer's doublets for the  $\text{Yb}^{3+}$  centre from complex **1**. Presented data corresponds to a NEVPT2 calculation applied on top a CASSCF(13,14) calculation (see Theoretical section in the main text for further information). (Right) Corresponding calculated Dieke diagram for the  $\text{Yb}^{3+}$  centre. Blue, yellow and red colours indicate emission stemming from the  $V_1$ ,  $V_2$  and  $V_3$  components of  $2F_{5/2}$  level, respectively.

## Supporting Information

### References

1. L. K. Soro, R. C. Knighton, F. Avecilla, W. Thor, F. Przybilla, O. Jeannin, D. Esteban-Gomez, C. Platas-Iglesias and L. J. Charbonnière, *Adv. Optical Mater.*, 2023, **11**, 2202307.
2. D. Aguilà, V. Velasco, L. A. Barrios, J. González-Fabra, C. Bo, S. J. Teat, O. Roubeau and G. Aromí, *Inorg. Chem.*, 2018, **57**, 8429-8439.
3. L. Abad Galán, D. Aguilà, Y. Guyot, V. Velasco, O. Roubeau, S. J. Teat, M. Massi and G. Aromí, *Chem. Eur. J.*, 2021, **27**, 7288-7299.
4. J. Mooney and P. Kambhampati, *J. Phys. Chem. Lett.*, 2013, **4**, 3316-3318.
5. M. J. Frisch, G. W. Trucks, H. B. Schlegel, G. E. Scuseria, M. A. Robb, J. R. Cheeseman, G. Scalmani, V. Barone, G. A. Petersson, H. Nakatsuji, X. Li, M. Caricato, A. V. Marenich, J. Bloino, B. G. Janesko, R. Gomperts, B. Mennucci, H. P. Hratchian, J. V. Ortiz, A. F. Izmaylov, J. L. Sonnenberg, Williams, F. Ding, F. Lipparini, F. Egidi, J. Goings, B. Peng, A. Petrone, T. Henderson, D. Ranasinghe, V. G. Zakrzewski, J. Gao, N. Rega, G. Zheng, W. Liang, M. Hada, M. Ehara, K. Toyota, R. Fukuda, J. Hasegawa, M. Ishida, T. Nakajima, Y. Honda, O. Kitao, H. Nakai, T. Vreven, K. Throssell, J. A. Montgomery Jr., J. E. Peralta, F. Ogliaro, M. J. Bearpark, J. J. Heyd, E. N. Brothers, K. N. Kudin, V. N. Staroverov, T. A. Keith, R. Kobayashi, J. Normand, K. Raghavachari, A. P. Rendell, J. C. Burant, S. S. Iyengar, J. Tomasi, M. Cossi, J. M. Millam, M. Klene, C. Adamo, R. Cammi, J. W. Ochterski, R. L. Martin, K. Morokuma, O. Farkas, J. B. Foresman and D. J. Fox, *Wallingford, CT*, 2016.
6. Y. Zhao and D. G. Truhlar, *Theor. Chem. Acc.*, 2008, **120**, 215-241.
7. Y. Zhao and D. G. Truhlar, *J. Chem. Phys.*, 2006, **125**, 194101.
8. A. Schäfer, H. Horn and R. Ahlrichs, *J. Chem. Phys.*, 1992, **97**, 2571-2577.
9. M. Dolg, H. Stoll, A. Savin and H. Preuss, *Theor. Chim. Acta*, 1989, **75**, 173-194.
10. M. Dolg, H. Stoll and H. Preuss, *J. Chem. Phys.*, 1989, **90**, 1730-1734.
11. R. T. Moura, M. Quintano, C. V. Santos-Jr, V. A. C. A. Albuquerque, E. C. Aguiar, E. Kraka and A. N. Carneiro Neto, *Optical Materials: X*, 2022, **16**, 100216.
12. B. S. D. Onishi, A. N. Carneiro Neto, R. Bortolletto-Santos, V. R. Masterlaro, L. D. Carlos, R. A. S. Ferreira and S. J. L. Ribeiro, *Nanoscale*, 2024, **16**, 6286-6295.
13. S. S. Nobre, P. P. Lima, L. Mafra, R. A. Sá Ferreira, R. O. Freire, L. Fu, U. Pischel, V. de Zea Bermudez, O. L. Malta and L. D. Carlos, *J. Phys. Chem. C*, 2007, **111**, 3275-3284.
14. W. M. Faustino, O. L. Malta and G. F. de Sá, *J. Chem. Phys.*, 2005, **122**, 54109.
15. O. L. Malta, *J. Lumin.*, 1997, **71**, 229-236.
16. A. N. Carneiro Neto, E. E. S. Teotonio, G. F. de Sá, H. F. Brito, J. Legendziewicz, L. D. Carlos, M. C. F. C. Felinto, P. Gawryszewska, R. T. Moura, R. L. Longo, W. M. Faustino and O. L. Malta, in *Handbook on the Physics and Chemistry of Rare Earths*, eds. J.-C. G. Bünzli and V. K. Pecharsky, Elsevier, 2019, vol. 56, pp. 55-162.
17. E. Kasprzycka, A. N. Carneiro Neto, V. A. Trush, L. Jerzykiewicz, V. M. Amirkhanov, O. L. Malta, J. Legendziewicz and P. Gawryszewska, *J. Rare Earths*, 2020, **38**, 552-563.
18. A. N. Carneiro Neto, E. Mamontova, A. M. P. Botas, C. D. S. Brites, R. A. S. Ferreira, J. Rouquette, Y. Guari, J. Larionova, J. Long and L. D. Carlos, *Adv. Optical Mater.*, 2022, **10**, 2101870.
19. O. L. Malta, *Chem. Phys. Lett.*, 1982, **87**, 27-29.
20. O. L. Malta, *Chem. Phys. Lett.*, 1982, **88**, 353-356.
21. W. T. Carnall, H. Crosswhite and H. M. Crosswhite, *Energy level structure and transition probabilities in the spectra of the trivalent lanthanides in LaF<sub>3</sub>*, Argonne National Lab. (ANL), Argonne, IL (United States), United States, 1978.
22. T. Kushida, *J. Phys. Soc. Jpn.*, 1973, **34**, 1318-1326.
23. E. Kasprzycka, A. N. Carneiro Neto, V. A. Trush, O. L. Malta, L. Jerzykiewicz, V. M. Amirkhanov, J. Legendziewicz and P. Gawryszewska, *Spectrochim. Acta A Mol. Biomol. Spectrosc.*, 2022, **274**, 121072.

## Supporting Information

24. S. Edvardsson and M. Klintonberg, *J. Alloys Compd.*, 1998, **275-277**, 230-233.
25. A. N. Carneiro Neto and R. T. Moura Jr, *Chem. Phys. Lett.*, 2020, **757**, 137884.
26. O. L. Malta, *J. Non-Cryst. Solids*, 2008, **354**, 4770-4776.
27. O. L. Malta and F. R. Gonçalves e Silva, *Spectrochim. Acta A Mol. Biomol. Spectrosc.*, 1998, **54**, 1593-1599.
28. O. L. Malta, H. F. Brito, J. F. S. Menezes, F. R. G. e. Silva, S. Alves, F. S. Farias and A. V. M. de Andrade, *J. Lumin.*, 1997, **75**, 255-268.
29. A. N. Carneiro Neto, R. T. Moura, Jr., A. Shyichuk, V. Paterlini, F. Piccinelli, M. Bettinelli and O. L. Malta, *J. Phys. Chem. C*, 2020, **124**, 10105-10116.
